# Supplementary material
Source: HighWire-hosted journal article supplement (https://bmjopen.bmj.com/content/12/6/e056803)
Supplement: inline-supplementary-material-2 [file inline-supplementary-material-2.pdf]

## Appendix 2. A list of excluded studies and reasons for exclusion

| Number | Title                                                                                                                                                                           | First author | Published year | Reason for exclusion                                      |
|--------|---------------------------------------------------------------------------------------------------------------------------------------------------------------------------------|--------------|----------------|-----------------------------------------------------------|
| 1      | Clinical Efficacy of Acupuncture on Rheumatoid Arthritis and Associated Mechanisms: A Systemic Review.                                                                          | Chou, PC     | 2018           | No meta-analysis                                          |
| 2      | Effectiveness of Acupuncture on Pain, Physical Function and Health-Related Quality of Life in Patients with Rheumatoid Arthritis: A Systematic Review of Quantitative Evidence. | Seca, S      | 2019           | No meta-analysis                                          |
| 3      | Meta-analysis of the therapeutic Effect of Treating Osteoarthritis with Filiform Needle                                                                                         | MA Jia-jian  | 2016           | Acupuncture combined with other therapies                 |
| 4      | Meta-analysis of Clinical Effect of Acupuncture and Moxibustion on Osteoarthritis/Osteodystrophy                                                                                | Feng Peng    | 2019           | Acupuncture combined with other therapies                 |
| 5      | A Meta-analysis of Improving the Function of Knee Osteoarthritis with Traditional Chinese Manipulation and Acupuncture                                                          | YU Saijun    | 2018           | Acupuncture combined with other therapies                 |
| 6      | Meta-analysis of Acupuncture and Moxibustion for Treatment of Osteoarthritis/Osteodystrophy                                                                                     | Hu Hanjiao   | 2016           | Acupuncture combined with other therapies                 |
| 7      | Acupuncture for Knee Osteoarthritis Relief in the Elderly: A Systematic Review and Meta-analysis.                                                                               | Gong, Zidan  | 2019           | Acupuncture combined with other therapies                 |
| 8      | Meta-analysis of the Effect of Acupuncture and Moxibustion on Knee Osteoarthritis Based on the theory of Meridians and Tendons                                                  | Yu Junfei    | 2018           | Control interventions did not meet the inclusion criteria |
| 9      | Effect of Acupuncture on Gonarthromenigitis: A Systematic Review                                                                                                                | Guo, Wei     | 2020           | Acupuncture combined with other therapies                 |
| 10     | Update on the Clinical Effect of Acupuncture therapy in Patients with Gouty Arthritis: Systematic Review and Meta-analysis.                                                     | Lu, W W      | 2016           | Acupuncture combined with other therapies                 |

|    |                                                                                                                                |               |      |                                                    |
|----|--------------------------------------------------------------------------------------------------------------------------------|---------------|------|----------------------------------------------------|
| 11 | Curative Effect of Acupuncture for Gouty Arthritis: Meta-analysis                                                              | LIU Chang     | 2015 | No detailed information on intervention or outcome |
| 12 | Acupuncture and Moxibustion for Primary Osteoporosis: An Overview of Systematic Review                                         | Xu, G         | 2020 | Acupuncture combined with other therapies          |
| 13 | Meta Analysis of Acupuncture Treatment of Primary Osteoporosis                                                                 | CHEN Jinfe ng | 2018 | Acupuncture combined with other therapies          |
| 14 | Meta-analysis of the therapeutic Effect of Acupuncture on Postmenopausal Osteoporosis and Acupoint Selection Method            | XIAO Li       | 2016 | Acupuncture combined with other therapies          |
| 15 | A Systematic Review of Acupuncture and Moxibustion for the Treatment of Lumbar Disc Herniation Caused by Sciatica              | Liu Jiaying   | 2015 | No meta-analysis                                   |
| 16 | Systematic Evaluation and Meta-analysis of Acupuncture Treatment for Residual Pain after Lumbar Disc Herniation                | LI Kai-min g  | 2020 | Acupuncture combined with other therapies          |
| 17 | Assessment of Methodological Quality and Reporting Quality of Systematic Reviews / Meta-analyses of Acupuncture for Sciatica   | TAN Hui-juan  | 2015 | Acupuncture combined with other therapies          |
| 18 | Efficacy of Acupressure for Chronic Low Back Pain: A Systematic Review.                                                        | Godley, Erica | 2020 | No meta-analysis                                   |
| 19 | Effect of Acupuncture on Pregnancy Related Low Back Pain and Pelvic Pain: A Systematic Review and Meta-analysis.               | Yao, X        | 2017 | Full text unavailable                              |
| 20 | Meta Analysis of Acupuncture and Moxibustion Treatment for Endometriosis                                                       | Xiao Xiaowen  | 2017 | Acupuncture combined with other therapies          |
| 21 | Is Acupuncture Effective in the Treatment of Pain in Endometriosis?.                                                           | Lund, I       | 2016 | No meta-analysis                                   |
| 22 | Efficacy and Safety of Acupuncture Combined with Moxibustion in the Treatment of Chronic Fatigue Syndrome: A Systematic Review | Hu Yue        | 2020 | Acupuncture combined with other therapies          |
| 23 | A Meta-analysis of Acupuncture and Mox                                                                                         | LUO Xiao-     | 2017 | Acupuncture                                        |

|    |                                                                                                                                   |                |      |                                                               |
|----|-----------------------------------------------------------------------------------------------------------------------------------|----------------|------|---------------------------------------------------------------|
|    | ibustion therapy for Scapulohumeral Periarthritis                                                                                 | zhou           |      | combined with other therapies                                 |
| 24 | A Systematic Review on Clinical Study of the Frozen Shoulder Treated with Three Shoulder Needles                                  | TANG Hongliang | 2015 | Acupuncture combined with other therapies                     |
| 25 | Acupuncture for Recovery after Surgery in Patients Undergoing Colorectal Cancer Resection: a Systematic Review and Meta-analysis. | Kim, K H       | 2016 | Acupuncture combined with other therapies                     |
| 26 | Effects of Acupuncture on Menopause-Related Symptoms in Breast Cancer Survivors: A Meta-analysis of Randomized Controlled Trials. | Chiu, H Y      | 2016 | Acupuncture interventions did not meet the inclusion criteria |
| 27 | Effects of Acupuncture on Breast Cancer-Related Lymphoedema: A Systematic Review and Meta-analysis.                               | Yu, S          | 2019 | Acupuncture interventions did not meet the inclusion criteria |
| 28 | Acupuncture in Medicine: Journal of the British Medical Acupuncture Society                                                       | Zhang, X       | 2019 | Acupuncture interventions did not meet the inclusion criteria |
| 29 | Acupuncture for Treating Hot Flashes in Breast Cancer Patients: An Updated Meta-analysis.                                         | Salehi, A      | 2016 | Acupuncture interventions did not meet the inclusion criteria |
| 30 | Meta-analysis of Application of Transcutaneous Electrical Acupoint Stimulation in Breast Cancer Surgery                           | FU Sisi        | 2020 | No detailed information on intervention or outcome            |
| 31 | Meta-analysis of Acupuncture Improving Quality of Life of Patients with Breast Cancer                                             | PEI Lixia      | 2019 | Acupuncture interventions did not meet the inclusion criteria |

|    |                                                                                                                                                 |              |      |                                                               |
|----|-------------------------------------------------------------------------------------------------------------------------------------------------|--------------|------|---------------------------------------------------------------|
|    |                                                                                                                                                 |              |      | usion criteria                                                |
| 32 | Effect of Acupressure on Chemotherapy-Induced Nausea and Vomiting of Breast Cancer Patients: A Meta-analysis                                    | Yan Meiyu    | 2018 | No detailed information on intervention or outcome            |
| 33 | The Effects of Auricular therapy for Cancer Pain: A Systematic Review and Meta-analysis.                                                        | Yang, Yulan  | 2020 | Control interventions did not meet the inclusion criteria     |
| 34 | Systematic Review and Meta-analysis of Acupuncture to Reduce Cancer-Related Pain.                                                               | Chiu, H Y    | 2017 | Acupuncture interventions did not meet the inclusion criteria |
| 35 | Acupuncture for Pain Management in Cancer: A Systematic Review and Meta-analysis.                                                               | Hu, C        | 2016 | Acupuncture interventions did not meet the inclusion criteria |
| 36 | A Systematic Review and Meta-analysis of the Efficacy of Acupuncture and Electroacupuncture Against Chemotherapy-Induced Peripheral Neuropathy. | Hwang, M S   | 2020 | No patient important outcome                                  |
| 37 | The Efficacy of Acupuncture in Chemotherapy-Induced Peripheral Neuropathy: Systematic Review and Meta-analysis.                                 | Chien, T J   | 2019 | Acupuncture combined with other therapies                     |
| 38 | Acupuncture in Adults with Chemotherapy-Induced Peripheral Neuropathy: a Systematic Review.                                                     | Baviera, A F | 2019 | Acupuncture combined with other therapies                     |
| 39 | Meta-analysis of Electroacupuncture for Chemotherapy-Induced Peripheral Neuropathy                                                              | KUANG Bi yao | 2019 | Acupuncture interventions did not meet the inclusion criteria |
| 40 | The Effects of Acupressure on Chemotherapy-Induced Nausea and Vomiting: A Meta-analysis                                                         | Wu, Ting     | 2020 | Acupuncture intervention                                      |

|    |                                                                                                                                                          |                |      |                                                                |
|----|----------------------------------------------------------------------------------------------------------------------------------------------------------|----------------|------|----------------------------------------------------------------|
|    | a-analysis                                                                                                                                               |                |      | s did not meet the inclusion criteria                          |
| 41 | Effect of Neiguan Acupoint Pressure on Improving Chemotherapy-Induced Nausea and Vomiting in Cancer Patients: A Meta-analysis                            | CHEN Feng      | 2020 | No detailed information on intervention or outcome             |
| 42 | Meta-analysis of Acupuncture Treatment for Gastrointestinal Reaction after Chemotherapy of Tumor                                                         | HU Ya-cai      | 2017 | Acupuncture intervention s did not meet the inclusion criteria |
| 43 | Acupuncture on Treating Angina Pectoris: A Systematic Review.                                                                                            | Wang, J S      | 2020 | No detailed information on intervention or outcome             |
| 44 | Acupuncture and Related therapies Used As Add-on to Conventional Treatments for Heart Failure: A Systematic Review of Pairwise and Network Meta-analyses | Yang, Feng wen | 2018 | Acupuncture combined with other therapies                      |
| 45 | Acupuncture on Treating Angina Pectoris: A Systematic Review.                                                                                            | Wang, J S      | 2020 | No detailed information on intervention or outcome             |
| 46 | Meta-analysis of the therapeutic Effect of Acupuncture on Stable Angina Pectoris                                                                         | ZHOU Jianhua   | 2018 | Acupuncture combined with other therapies                      |
| 47 | Effectiveness of Acupuncture for Angina Pectoris: A Systematic Review of Randomized Controlled Trials.                                                   | Yu, C          | 2015 | Acupuncture combined with other therapies                      |
| 48 | Acupuncture therapy for the Treatment of Stable Angina Pectoris: An Updated Meta-analysis of Randomized Controlled Trials.                               | Liu, Y         | 2019 | Acupuncture intervention s did not meet the inclusion criteria |
| 49 | Meta-analysis of Acupuncture therapy for                                                                                                                 | Chen, M        | 2015 | Acupuncture                                                    |

|    |                                                                                                                         |            |      |                                                               |
|----|-------------------------------------------------------------------------------------------------------------------------|------------|------|---------------------------------------------------------------|
|    | the Treatment of Stable Angina Pectoris.                                                                                |            |      | interventions did not meet the inclusion criteria             |
| 50 | Meta-analysis of Acupuncture therapy for the Treatment of Stable Angina Pectoris.                                       | Zhang, Z.  | 2015 | Acupuncture interventions did not meet the inclusion criteria |
| 51 | Acupuncture As An Adjunctive Treatment for Angina Due to Coronary Artery Disease: A Meta-analysis.                      | Huang, X   | 2019 | Control interventions did not meet the inclusion criteria     |
| 52 | Acupuncture for Perioperative Care of Total Hip Arthroplasty: A Systemic Review of Controlled Trials and Meta-analysis. | Shin H     | 2019 | No detailed information on intervention or outcome            |
| 53 | Systematic Review of Three Electrical Stimulation Techniques for Rehabilitation after Total Knee Arthroplasty.          | Yue, C     | 2018 | No meta-analysis                                              |
| 54 | Acupuncture therapy for Essential Hypertension: A Network Meta-analysis.                                                | Tan, X     | 2019 | No patient important outcome                                  |
| 55 | Acupuncture for Essential Hypertension: A Meta-analysis                                                                 | G., C Xiao | 2015 | No patient important outcome                                  |
| 56 | Conventional Acupuncture for Cardiac Arrhythmia: A Systematic Review of Randomized Controlled Trials.                   | Liu, J     | 2018 | No detailed information on intervention or outcome            |
| 57 | Acupuncture-Related Cardiac Complications: A Systematic Review.                                                         | Ullah, W   | 2019 | No detailed information on intervention or outcome            |
| 58 | A Meta-analysis of the Effectiveness of Acupuncture on Chd                                                              | Sun Yang   | 2019 | Acupuncture interventions did not meet the incl               |

|    |                                                                                                                                                                                                           |                |      |                                                               |
|----|-----------------------------------------------------------------------------------------------------------------------------------------------------------------------------------------------------------|----------------|------|---------------------------------------------------------------|
|    |                                                                                                                                                                                                           |                |      | usion criteria                                                |
| 59 | Systematic Review on Treatment of Perimenopausal Syndrome with Electroacupuncture and Hormone Replacement                                                                                                 | CHENG Xiaoling | 2018 | No patient important outcome                                  |
| 60 | Comparison System Evaluation on Acupuncture and Western Medicine Effect in the Treatment of Perimenopausal Syndrome                                                                                       | LAI Bin        | 2017 | No patient important outcome                                  |
| 61 | Systematic Review of Auricular-Plaster therapy for Treatment of Perimenopausal Syndrome                                                                                                                   | Jin Huali      | 2017 | No patient important outcome                                  |
| 62 | Acupuncture Versus Hormone Replacement therapy for Menopause Syndrome: A Meta-analysis                                                                                                                    | MENG Fang      | 2016 | No patient important outcome                                  |
| 63 | Systematic Evaluation of the Efficacy of Acupuncture on Perimenopausal Syndrome                                                                                                                           | CAO Zhengliang | 2015 | Acupuncture interventions did not meet the inclusion criteria |
| 64 | Effectiveness of Traditional Chinese Acupuncture Versus Sham Acupuncture: A Systematic Review.                                                                                                            | Carlos, L      | 2016 | No meta-analysis                                              |
| 65 | Acupuncture in Sham Device-Controlled Trials May Not Be As Effective As Acupuncture in the Real World: A Preliminary Network Meta-analysis of Studies of Acupuncture for Hot Flashes in Menopausal Women. | Kim, T H       | 2020 | Control interventions did not meet the inclusion criteria     |
| 66 | Acupuncture for Menopausal Hot Flashes.                                                                                                                                                                   | Weihua, L      | 2015 | Acupuncture interventions did not meet the inclusion criteria |
| 67 | Effects of Acupuncture on Menopause-Related Symptoms and Quality of Life in Women on Natural Menopause: A Meta-analysis of Randomized Controlled Trials.                                                  | Chiu, H Y      | 2015 | Acupuncture interventions did not meet the inclusion criteria |
| 68 | Acupuncture to Reduce Sleep Disturbances in Perimenopausal and Postmenopausal Women: A Systematic Review and Meta-                                                                                        | Chiu, H Y      | 2015 | Acupuncture interventions did not m                           |

|    |                                                                                                                                                            |                   |      |                                                               |
|----|------------------------------------------------------------------------------------------------------------------------------------------------------------|-------------------|------|---------------------------------------------------------------|
|    | analysis.                                                                                                                                                  |                   |      | meet the inclusion criteria                                   |
| 69 | Systematic Evaluation of Acupuncture Treatment of Perimenopausal Sleep Disorder Based on Grade                                                             | Zhang Guang-Cai   | 2016 | Control interventions did not meet the inclusion criteria     |
| 70 | Safety and Effectiveness of Acupuncture for Women Emotional Disorders in Perimenopause: A Systematic Review                                                | WANG Ying         | 2018 | Control interventions did not meet the inclusion criteria     |
| 71 | Massage, Reflexology and Other Manual Methods for Pain Management in Labor                                                                                 | Smith, C A        | 2018 | Acupuncture interventions did not meet the inclusion criteria |
| 72 | Meta-analysis of the Effects of Acupressure During Labor.                                                                                                  | Santiago-Vasco, M | 2017 | Full text unavailable                                         |
| 73 | Meta-analysis of the Effect of Acupressure on Duration of Labor and Mode of Delivery.                                                                      | Makvandi, S       | 2016 | No patient important outcome                                  |
| 74 | Effects of Acupressure in Labor: A Meta-analysis.                                                                                                          | Bejar, C          | 2016 | Full text unavailable                                         |
| 75 | Acupuncture Performed Around the Time of Embryo Transfer: A Systematic Review and Meta-analysis.                                                           | Smith, C A        | 2019 | Acupuncture interventions did not meet the inclusion criteria |
| 76 | Therapeutic Effect of Acupuncture on the Outcomes of in Vitro Fertilization: A Systematic Review and Meta-analysis.                                        | Qian, Y           | 2017 | Acupuncture interventions did not meet the inclusion criteria |
| 77 | Effects of Acupuncture on Pregnancy in Patients Undergoing in Vitro Fertilization and Embryo Transfer: A Systematic Review of Randomized Controlled Trials | YANG Hui-sheng    | 2017 | Acupuncture combined with other therapies                     |
| 78 | The Role of Acupuncture in In Vitro Fertilization: A Systematic Review and Meta-                                                                           | Shen, C           | 2015 | No patient important outcome                                  |



|    |                                                                                                                                                                                      |                  |      |                                                               |
|----|--------------------------------------------------------------------------------------------------------------------------------------------------------------------------------------|------------------|------|---------------------------------------------------------------|
|    | analysis.                                                                                                                                                                            |                  |      | tcome                                                         |
| 79 | Interventions for Heartburn in Pregnancy.                                                                                                                                            | Phupong, V       | 2015 | Acupuncture interventions did not meet the inclusion criteria |
| 80 | Treatments for Breast Engorgement During Lactation                                                                                                                                   | Mangesi, Lindaka | 2016 | Acupuncture interventions did not meet the inclusion criteria |
| 81 | Effects of Acupuncture for the Treatment of Endometriosis-Related Pain: A Systematic Review and Meta-analysis.                                                                       | Xu, Y            | 2017 | Control interventions did not meet the inclusion criteria     |
| 82 | Meta-analysis of Acupuncture and Moxibustion Treatment for Endometriosis                                                                                                             | Xiao Xiaowen     | 2017 | Acupuncture interventions did not meet the inclusion criteria |
| 83 | Network Meta-analysis on the Effects of the Acupuncture-Related therapy on Ovulation Rate and Pregnancy Rate in Patients with Polycystic Ovary Syndrome.                             | Song, Y J2019    | 2019 | No patient important outcome                                  |
| 84 | Systematic Review of Acupuncture in Treatment of Polycystic Ovary Syndrome in China                                                                                                  | ZHENG Shuzhen    | 2019 | No patient important outcome                                  |
| 85 | Effectiveness of Acupuncture in Women with Polycystic Ovarian Syndrome Undergoing In Vitro Fertilization Or Intracytoplasmic Sperm Injection: A Systematic Review and Meta-analysis. | Jo, J            | 2017 | No patient important outcome                                  |
| 86 | Acupuncture for Polycystic Ovarian Syndrome: A Systematic Review and Meta-analysis.                                                                                                  | Jo, J            | 2017 | Acupuncture combined with other therapies                     |
| 87 | Effect of Acupuncture on Premenstrual Syndrome: A Meta-analysis                                                                                                                      | LIU Lihong       | 2019 | Acupuncture combined with other therapies                     |

|    |                                                                                                                         |                |      |                                                               |
|----|-------------------------------------------------------------------------------------------------------------------------|----------------|------|---------------------------------------------------------------|
| 88 | Systematic Evaluation and Meta-analysis of Acupuncture-Moxibustion Alone in Treating Premature Ovarian Failure          | ZHANG Jin-Huan | 2020 | Acupuncture interventions did not meet the inclusion criteria |
| 89 | Meta-analysis of the therapeutic Effect of Acupuncture on Premature Ovarian Failure                                     | FAN Meiling    | 2018 | No patient important outcome                                  |
| 90 | Systematic Review and Meta-analysis of Efficacy of Acupuncture in the Treatment of Premature Ovarian Failure            | LUO Xi         | 2016 | No patient important outcome                                  |
| 91 | Meta-analysis the Effect of Acupuncture in Treating Premature Ovarian Failure                                           | PANG Yong      | 2016 | No patient important outcome                                  |
| 92 | Effect of Acupuncture therapy on Chronic Pelvic Inflammatory Disease: A Meta-analysis                                   | HE Ting        | 2019 | Acupuncture combined with other therapies                     |
| 93 | Systematic Review and Meta-analysis of Acupuncture Intervention on Hot Flashes in Patients with Breast Cancer           | Tao Weiwei     | 2019 | Acupuncture interventions did not meet the inclusion criteria |
| 94 | Short-and Medium-Clinical Effect of Acupuncture in Treating Hot Flashes in Patients with Breast Cancer: A Meta-analysis | Lu Jing        | 2018 | Acupuncture combined with other therapies                     |
| 95 | A Meta-analysis of Treating Primary Dysmenorrhea by Acupuncture                                                         | Liu Guodong    | 2019 | Acupuncture interventions did not meet the inclusion criteria |
| 96 | Meta-analysis of Clinical Literature on Acupuncture and Moxibustion for Primary Dysmenorrhea                            | Qin Yanping    | 2017 | Control interventions did not meet the inclusion criteria     |
| 97 | Meta-analysis of Auricular Plaster therapy for Primary Dysmenorrhea                                                     | Wang Jing      | 2017 | No patient important outcome                                  |
| 98 | Meta-analysis of Acupuncture and Moxib                                                                                  | Liu Tian       | 2016 | No patient i                                                  |

|     |                                                                                                        |              |      |                                                               |
|-----|--------------------------------------------------------------------------------------------------------|--------------|------|---------------------------------------------------------------|
|     | ustion for Treatment of Primary Dysmenorrhea                                                           |              |      | important outcome                                             |
| 99  | A Meta-analysis of Clinical Efficacy of Acupuncture on Dysmenorrhea                                    | Quan Yubin   | 2016 | No patient important outcome                                  |
| 100 | Systematic Review of Abdominal Acupuncture Treatment for Dysmenorrhea                                  | HUANG Shimin | 2016 | Acupuncture interventions did not meet the inclusion criteria |
| 101 | Meta-analysis of Auricular Plaster therapy for Primary Dysmenorrhea                                    | Wang Xiang   | 2016 | No patient important outcome                                  |
| 102 | Meta-analysis of Primary Dysmenorrhea Treated by Acupuncture                                           | LIN Han-mei  | 2015 | Control interventions did not meet the inclusion criteria     |
| 103 | Meta-analysis of Clinical Literature on Acupuncture-Based Treatment of Menstrual Disorders             | Cai Weiping  | 2018 | Acupuncture combined with other therapies                     |
| 104 | Systematic Review and Meta-analysis of Acupuncture in the Treatment of Premature Ovarian Dysfunction   | Yin Yaqian   | 2020 | No patient important outcome                                  |
| 105 | Acupuncture in Improving Endometrial Receptivity: A Systematic Review and Meta-analysis.               | Zhong, Y     | 2019 | Acupuncture interventions did not meet the inclusion criteria |
| 106 | Meta-analysis on the Effectiveness of Acupuncture and Moxibustion in Improving Endometrial Receptivity | Li Zheyun    | 2019 | Control interventions did not meet the inclusion criteria     |
| 107 | Meta-analysis on Acupuncture therapy for Improving Endometrial Receptivity                             | HU Qiulan    | 2017 | No patient important outcome                                  |
| 108 | A Meta-analysis of Acupuncture and Moxibustion for Luteinized Unruptured Follicle Syndrome             | ZHOU Jie     | 2017 | Acupuncture combined with other therapies                     |

|     |                                                                                                                                                                              |               |      |                                                               |
|-----|------------------------------------------------------------------------------------------------------------------------------------------------------------------------------|---------------|------|---------------------------------------------------------------|
| 109 | A Systematic Review on the Outcome of Transcutaneous Electrical Acupoint Stimulation in the Treatment of Ovarian Hyporesponsiveness                                          | Wu Jiejie     | 2018 | No patient important outcome                                  |
| 110 | Acupuncture for in Vitro Fertilization In women with Poor Ovarian Response: A Systematic Review                                                                              | Jang, S       | 2020 | No meta-analysis                                              |
| 111 | Acupuncture Or Acupressure for Induction of Labour                                                                                                                           | Smith, C. A.  | 2017 | Acupuncture interventions did not meet the inclusion criteria |
| 112 | Effectiveness of Acupuncture in Polycystic Ovary Syndrome: A Systematic Review and Meta-analysis of Randomized Controlled Trials                                             | Wu, J.        | 2020 | No patient important outcome                                  |
| 113 | Acupuncture for Polycystic Ovarian Syndrome                                                                                                                                  | Lim, C.       | 2019 | No patient important outcome                                  |
| 114 | Efficacy of Acupuncture Versus Western Medication for Premature Ovarian Failure: A Meta-analysis                                                                             | Runzi Jian    | 2017 | No patient important outcome                                  |
| 115 | Meta-analysis of Acupuncture Treatment for Primary Ovarian Insufficiency                                                                                                     | Tingting Zhao | 2020 | No patient important outcome                                  |
| 116 | Acupuncture Treatment for Urinary Retention Following Spinal Cord Injury: A Meta-analysis                                                                                    | Cheng Jie     | 2018 | Acupuncture combined with other therapies                     |
| 117 | Acupuncture for Chronic Urinary Retention due to Spinal Cord Injury: A Systematic Review.                                                                                    | Wang, J       | 2016 | Acupuncture combined with other therapies                     |
| 118 | The Effect of Different Acupuncture therapies on Neurological Recovery in Spinal Cord Injury: A Systematic Review and Network Meta-analysis of Randomized Controlled Trials. | Xiong, F      | 2019 | Acupuncture combined with other therapies                     |
| 119 | The Impact of Acupuncture on Neurological Recovery in Spinal Cord Injury: A Systematic Review and Meta-analysis.                                                             | Ma, R         | 2015 | Acupuncture combined with other therapies                     |
| 120 | Electroacupuncture Treatment for Neuroge                                                                                                                                     | FU Linhui     | 2019 | Acupuncture                                                   |

|     |                                                                                                                                                        |                      |      |                                                               |
|-----|--------------------------------------------------------------------------------------------------------------------------------------------------------|----------------------|------|---------------------------------------------------------------|
|     | nic Bladder after Spinal Cord Injury:A Meta-analysis                                                                                                   |                      |      | combined with other therapies                                 |
| 121 | Systematic Evaluation of Acupuncture for the Treatment of Neurogenic Bladder Dysfunction after Spinal Cord Injury                                      | WANG Jia-qi          | 2018 | No meta-analysis                                              |
| 122 | Acupuncture for the Effect and Safety of Neurogenic Bladder after Spinal Cord Injury:A Meta-analysis                                                   | FAN Xiao             | 2017 | Acupuncture combined with other therapies                     |
| 123 | A Meta-analysis of the Effectiveness of Acupuncture in the Treatment of Epilepsy.                                                                      | Deng, B W            | 2018 | No patient important outcome                                  |
| 124 | Non-Pharmacological Interventions for People with Epilepsy and Intellectual Disabilities.                                                              | Jackson, C F         | 2015 | Acupuncture interventions did not meet the inclusion criteria |
| 125 | Transcutaneous Electrical Nerve Stimulation for Spasticity: A Systematic Review.                                                                       | Fernández-Tenorio, E | 2019 | No meta-analysis                                              |
| 126 | Systematic Review of Efficacy of TENS for Management of Central Pain in People with Multiple Sclerosis.                                                | Sawant, A            | 2015 | No Meta-analysis                                              |
| 127 | Acupuncture for Obstructive Sleep Apnea (Osa) in Adults: A Systematic Review and Meta-analysis.                                                        | Wang, Liao yao       | 2020 | Acupuncture interventions did not meet the inclusion criteria |
| 128 | Clinical Effect of Acupuncture therapy on Obstructive Sleep Apnea Hypopnea Syndrome: A Meta-analysis                                                   | JIAO Su-qin          | 2018 | Acupuncture interventions did not meet the inclusion criteria |
| 129 | The Clinical Effect of Acupuncture in the Treatment of Obstructive Sleep Apnea: A Systematic Review and Meta-analysis of Randomized Controlled Trials. | Lv, Z T              | 2016 | No patient important outcome                                  |
| 130 | Meta-analysis of Obstructive Sleep Apnea in Traditional Chinese Medicine                                                                               | Zhang Ruizhi         | 2016 | Acupuncture interventions did not meet the inclusion criteria |

|     |                                                                                                                     |                |      |                                                               |
|-----|---------------------------------------------------------------------------------------------------------------------|----------------|------|---------------------------------------------------------------|
|     |                                                                                                                     |                |      | usion criteria                                                |
| 131 | Clinical Effectiveness of Ziwuliuzhu Acupuncture therapy for Insomnia: A Meta-analysis                              | Hu Yue         | 2019 | Control interventions did not meet the inclusion criteria     |
| 132 | A Meta-analysis of Randomized Controlled Trials of Intradermal Needle for Insomnia                                  | Ma Zengbin     | 2019 | Control interventions did not meet the inclusion criteria     |
| 133 | Meta-analysis and Systematic Review of Abdominal Acupuncture for Insomnia                                           | Li Zhen        | 2019 | Control interventions did not meet the inclusion criteria     |
| 134 | Meta-analysis of Clinical Efficacy of Auricular Acupoints in Treating Insomnia                                      | LI Dong-shuang | 2019 | Acupuncture combined with other therapies                     |
| 135 | Eye Acupuncture in the Treatment of Insomnia: a Systematic Review and Meta-analysis of Randomized Controlled Trials | Liu Guanghui   | 2018 | Acupuncture interventions did not meet the inclusion criteria |
| 136 | Systematic Review on Effect of Point Massage in Treatment of Insomnia                                               | Yu Mengying    | 2017 | No Meta-analysis                                              |
| 137 | Meta-analysis on the therapeutic Effect of Acupuncture in Treating Insomnia in China                                | LIU Weimin     | 2017 | Acupuncture interventions did not meet the inclusion criteria |
| 138 | Meta-analysis of Clinical Effect of Acupuncture and Moxibustion on Insomnia                                         | Mao Nan        | 2016 | Control interventions did not meet the inclusion criteria     |
| 139 | Electro-acupuncture for Primary Insomnia and Psqi: A Systematic Review                                              | WEI Xin-ran    | 2016 | Control interventions did not meet the inclusion              |

|     |                                                                                                                             |               |      |                                                               |
|-----|-----------------------------------------------------------------------------------------------------------------------------|---------------|------|---------------------------------------------------------------|
|     |                                                                                                                             |               |      | n criteria                                                    |
| 140 | Meta-analysis of Curative Effect on Acupuncture for Insomnia                                                                | GAO Xiyan     | 2015 | Acupuncture interventions did not meet the inclusion criteria |
| 141 | Meta-analysis on Acupuncture Treatment of Insomnia                                                                          | Chen Deyao    | 2015 | Acupuncture interventions did not meet the inclusion criteria |
| 142 | Curative Effect of Acupuncture therapy for Insomnia of Yin Deficiency Type: A Meta-analysis                                 | WANG Fei      | 2015 | Acupuncture interventions did not meet the inclusion criteria |
| 143 | Effectiveness of Auricular Point therapy for Insomnia: A Meta-analysis                                                      | Yang Yuanyuan | 2015 | Control interventions did not meet the inclusion criteria     |
| 144 | Meta-analysis of Auricular Point therapy on Insomnia                                                                        | HUANG Lu      | 2015 | Control interventions did not meet the inclusion criteria     |
| 145 | Network Meta-analysis on Ear Acupuncture for Hemodialysis Patients with Insomnia                                            | XU Ziqi       | 2019 | Control interventions did not meet the inclusion criteria     |
| 146 | Meta-analysis of the Effect of Auricular Point Plaster therapy on Insomnia in Patients with Perimenopausal Period           | PENG Siqi     | 2020 | Acupuncture combined with other therapies                     |
| 147 | Acupuncture to Reduce Sleep Disturbances in Perimenopausal and Postmenopausal Women: A Systematic Review and Meta-analysis. | Chiu, H Y     | 2016 | Acupuncture combined with other therapies                     |
| 148 | Acupuncture to Treat Sleep Disorders in Postmenopausal Women: A Systematic Review                                           | Bezerra, A G  | 2015 | No Meta-analysis                                              |

|     |                                                                                                               |                 |      |                                                               |
|-----|---------------------------------------------------------------------------------------------------------------|-----------------|------|---------------------------------------------------------------|
|     | view.                                                                                                         |                 |      |                                                               |
| 149 | A Meta-analysis on Effectiveness of Acupuncture on Post-Stroke Insomnia                                       | NIE Fenfen      | 2020 | No patient important outcome                                  |
| 150 | Meta-analysis of Auricular Acupuncture in the Treatment of Post-Stroke Insomnia                               | ZHANG Shuangmei | 2019 | Acupuncture interventions did not meet the inclusion criteria |
| 151 | Acupuncture for Insomnia after Stroke: a Systematic Review and Meta-analysis.                                 | Lee, S H        | 2016 | Acupuncture interventions did not meet the inclusion criteria |
| 152 | Acupuncture for Insomnia in the Elderly: A Meta-analysis                                                      | Li Heng         | 2016 | Acupuncture interventions did not meet the inclusion criteria |
| 153 | Acupuncture for Managing Cancer-Related Insomnia: A Systematic Review of Randomized Clinical Trials.          | Choi, T Y       | 2017 | Acupuncture interventions did not meet the inclusion criteria |
| 154 | Effect of Self-acupressure for Symptom Management: A Systematic Review                                        | Song, H J       | 2015 | No Meta-analysis                                              |
| 155 | Meta-analysis of the Effect of Auricular Point Plaster therapy on Insomnia in Patients with Diabetes          | ZHU Wenli       | 2018 | Acupuncture combined with other therapies                     |
| 156 | Efficacy of Acupuncture-Moxibustion on Peripheral Facial Paralysis At Different Time Points: A Meta-analysis. | Jin, D D        | 2020 | Control interventions did not meet the inclusion criteria     |
| 157 | Electroacupuncture Is Effective for Peripheral Facial Paralysis: A Meta-analysis.                             | Wang, W H       | 2020 | Control interventions did not meet the inclusion criteria     |



|     |                                                                                                                                 |             |      |                                                               |
|-----|---------------------------------------------------------------------------------------------------------------------------------|-------------|------|---------------------------------------------------------------|
| 158 | Compare the Efficacy of Acupuncture with Drugs in the Treatment of Bell's Palsy: A Systematic Review and Meta-analysis of Rcts. | Zhang, R    | 2019 | Acupuncture interventions did not meet the inclusion criteria |
| 159 | Meta-analysis of Electroacupuncture Treatment for Peripheral Facial Paralysis During Acute Period                               | ZHU Yi-lin  | 2016 | Acupuncture combined with other therapies                     |
| 160 | System Evaluation of the Clinical Literature of Peripheral Facial Paralysis Acupuncture Treatment                               | LI Jia      | 2015 | No meta-analysis                                              |
| 161 | Efficacy of Acupuncture for Bell's Palsy: A Systematic Review and Meta-analysis of Randomized Controlled Trials.                | Li, P       | 2015 | Acupuncture interventions did not meet the inclusion criteria |
| 162 | Meta-analysis of therapeutic Effect of Acupuncture and Moxibustion on Facial Paralysis                                          | Zhang Ting  | 2015 | Acupuncture combined with other therapies                     |
| 163 | Is Acupuncture An Effective Postherpetic Neuralgia Treatment? A Systematic Review and Meta-analysis.                            | Pei, W      | 2019 | Acupuncture interventions did not meet the inclusion criteria |
| 164 | Acupuncture for Postherpetic Neuralgia: Systematic Review and Meta-analysis.                                                    | Wang, Y     | 2018 | Acupuncture interventions did not meet the inclusion criteria |
| 165 | Acupuncture for Neuropathic Pain in Adults                                                                                      | Ju, Zi Yong | 2017 | Acupuncture interventions did not meet the inclusion criteria |
| 166 | Systematic Review of Electro-acupuncture in the Treatment of Neuropathic Pain                                                   | ZHOU Jie    | 2017 | Acupuncture combined with other therapies                     |

|     |                                                                                                                                                            |                   |      |                                                              |
|-----|------------------------------------------------------------------------------------------------------------------------------------------------------------|-------------------|------|--------------------------------------------------------------|
|     |                                                                                                                                                            |                   |      | herapies                                                     |
| 167 | Meta-analysis of Acupuncture in the Treatment of Pathogenic Motor Symptoms of Parkinson's Disease                                                          | ZHOU Jing         | 2020 | Acupuncture combined with other therapies                    |
| 168 | Meta-analysis of Acupuncture for Parkinson's Disease                                                                                                       | Liu Mohan         | 2019 | Acupuncture combined with other therapies                    |
| 169 | Meta-analysis of Clinical Efficacy of Acupuncture in Treatment of Parkinson's Disease                                                                      | Liu Yanhui        | 2018 | Acupuncture combined with other therapies                    |
| 170 | Clinical Effectiveness of Acupuncture on Parkinson Disease: A Prisma-Compliant Systematic Review and Meta-analysis                                         | Lee, S H          | 2017 | Acupuncture combined with other therapies                    |
| 171 | The Effectiveness and Safety of Acupuncture for the Treatment of Myasthenia Gravis: A Systematic Review and Meta-analysis of Randomized Controlled Trials. | Zhang, X          | 2019 | Acupuncture intervention did not meet the inclusion criteria |
| 172 | Scalp Acupuncture Treatment for Children's Autism Spectrum Disorders: A Systematic Review and Meta-analysis.                                               | Liu, C            | 2019 | Acupuncture combined with other therapies                    |
| 173 | A Meta-analysis of Treating Autism Spectrum Disorders by Acupuncture                                                                                       | Yue Qianjun       | 2019 | Acupuncture combined with other therapies                    |
| 174 | Systematic Evaluation of Acupuncture therapy for Childhood Autism                                                                                          | YUAN Zhao-hong    | 2016 | Acupuncture combined with other therapies                    |
| 175 | Meta-analysis of Curative Efficacy of Acupuncture for Children with Autism                                                                                 | Zhang Chengximeng | 2015 | Acupuncture combined with other therapies                    |
| 176 | Systematic Review: Acupuncture Vs Standard Pharmacological therapy for Migraine Prevention.                                                                | Zhang, N          | 2020 | No meta-analysis                                             |
| 177 | Efficacy of Acupuncture for Improving Migraine Symptoms and Cerebral Blood Flow                                                                            | Lu Tingting       | 2019 | Acupuncture intervention                                     |

|     |                                                                                                         |                   |      |                                                               |
|-----|---------------------------------------------------------------------------------------------------------|-------------------|------|---------------------------------------------------------------|
|     | ow Velocity: a Meta-analysis                                                                            |                   |      | s did not meet the inclusion criteria                         |
| 178 | Effectiveness and Safety of Acupuncture Versus Drug Treatment for Migraine Prophylaxis: a Meta-analysis | Pu Shengxi<br>ong | 2017 | Acupuncture interventions did not meet the inclusion criteria |
| 179 | Verum Versus Sham Manual Acupuncture for Migraine: A Systematic Review of Randomised Controlled Trials. | Yang, Y           | 2016 | Acupuncture combined with other therapies                     |
| 180 | Meta-analysis on Prevention Comparison of Acupuncture with Western Medicine for Migraine                | SONG Qian         | 2016 | Acupuncture interventions did not meet the inclusion criteria |
| 181 | Clinical Efficacy and Safety of Acupuncture in the Treatment of Tension Headache                        | DENG Gan          | 2018 | Acupuncture interventions did not meet the inclusion criteria |
| 182 | Meta-analysis of Acupuncture therapy in the Treatment of Tension-Type Headache                          | ZHANG Xue         | 2018 | Control interventions did not meet the inclusion criteria     |
| 183 | Acupuncture Versus Western Medicine for Tension-Type Headache in China: A Systematic Review             | HU Lin            | 2015 | Acupuncture interventions did not meet the inclusion criteria |
| 184 | Acupuncture Treatment for the Cervicogenic Headache—Updated Systematic Review                           | TANG Xu           | 2017 | Acupuncture interventions did not meet the inclusion criteria |
| 185 | Systematic Review of Acupuncture and                                                                    | Li Siyu           | 2018 | Acupuncture                                                   |

|     |                                                                                                                                                    |                 |      |                                                               |
|-----|----------------------------------------------------------------------------------------------------------------------------------------------------|-----------------|------|---------------------------------------------------------------|
|     | Moxibustion in Treatment of Mild Cognitive Impairment                                                                                              |                 |      | interventions did not meet the inclusion criteria             |
| 186 | Meta-analysis of Acupuncture Clinical Efficacies on Ischemic Type Cognitive Dysfunction                                                            | LU Jin-hua      | 2015 | Acupuncture combined with other therapies                     |
| 187 | Clinical Efficacy of Scalp Acupuncture on Mild Cognitive Impairment: a Meta-analysis Study                                                         | MAI Wei         | 2015 | Acupuncture combined with other therapies                     |
| 188 | Meta-analysis of Acupuncture therapy for Carpal Tunnel Syndrome                                                                                    | FAN Ye          | 2019 | Acupuncture combined with other therapies                     |
| 189 | Clinical Effect of Acupuncture on Postpartum Depression: A Meta-analysis                                                                           | PANG Yong       | 2016 | Acupuncture combined with other therapies                     |
| 190 | Effectiveness and Safety of Ear Acupuncture for Trauma-Related Mental Disorders after Large-Scale Disasters: A Prisma-Compliant Systematic Review. | Kwon, C Y       | 2020 | No meta-analysis                                              |
| 191 | Acupuncture for the Treatment of Adults with Posttraumatic Stress Disorder: A Systematic Review and Meta-analysis.                                 | Grant, S        | 2018 | Acupuncture interventions did not meet the inclusion criteria |
| 192 | Transcutaneous Electrical Nerve Stimulation (Tens) for Fibromyalgia in Adults                                                                      | Johnson, Mark I | 2017 | No meta-analysis                                              |
| 193 | Ear Acupuncture therapy in Preventing Postoperative Nausea and Emesis: A Systematic Review and Meta-analysis of Randomized Controlled Trials       | GAO Yanyu       | 2017 | Acupuncture combined with other therapies                     |
| 194 | Acupuncture for Glaucoma.                                                                                                                          | Law, S K        | 2020 | No meta-analysis                                              |
| 195 | The Efficacy of Acupuncture in Managing Patients with Chronic Prostatitis/Chronic Pelvic Pain Syndrome: A Systemic Review and Meta-analysis.       | Chang, S C      | 2017 | Acupuncture interventions did not meet the inclusion criteria |

|     |                                                                                                                           |                 |      |                                                               |
|-----|---------------------------------------------------------------------------------------------------------------------------|-----------------|------|---------------------------------------------------------------|
|     |                                                                                                                           |                 |      | a                                                             |
| 196 | Efficacy of Electroacupuncture in the Treatment of Prostatitis: a Systematic Review                                       | Su Tongshe      | 2017 | Acupuncture interventions did not meet the inclusion criteria |
| 197 | Comparison of the Efficacy of Acupuncture and Western Medicine Treatment on Chronic Prostatitis in China: Meta-analysis   | YU Li-Zhong     | 2017 | Acupuncture interventions did not meet the inclusion criteria |
| 198 | Meta-analysis of Acupuncture Treatment of Chronic Prostatitis                                                             | PANG Yong       | 2016 | Acupuncture interventions did not meet the inclusion criteria |
| 199 | Meta-analysis on Acupuncture in Treating Chronic Prostatitis                                                              | HE Yuan         | 2015 | Acupuncture interventions did not meet the inclusion criteria |
| 200 | Acupuncture As a Treatment Modality in Dermatology: A Systematic Review.                                                  | Ma, C           | 2015 | No meta-analysis                                              |
| 201 | Acupuncture for Cancer Pain in Adults                                                                                     | Paley, C A      | 2015 | No meta-analysis                                              |
| 202 | Transcutaneous Electrical Nerve Stimulation for Treating Neurogenic Lower Urinary Tract Dysfunction: A Systematic Review. | Gross, T        | 2016 | No meta-analysis                                              |
| 203 | Meta-analysis of Clinical Efficacy of Acupuncture in Treatment of Tic Disorders                                           | Zhao Runzhi     | 2020 | No patient important outcome                                  |
| 204 | Meta-analysis on the therapeutic Effect of Acupuncture on Guillian-Barre Syndrome                                         | LONG Kang-sheng | 2015 | Acupuncture interventions did not meet the inclusion criteria |
| 205 | A Meta-analysis of Acupuncture and Moxibustion in Treatment of Sciatica                                                   | HAN Yiyang      | 2017 | Acupuncture intervention                                      |

|     |                                                                                                                              |              |      |                                                               |
|-----|------------------------------------------------------------------------------------------------------------------------------|--------------|------|---------------------------------------------------------------|
|     |                                                                                                                              |              |      | s did not meet the inclusion criteria                         |
| 206 | Meta-analysis of the Efficacy of Acupuncture Treatment for Infantile Cerebral Palsy                                          | XIANG Juan   | 2015 | Acupuncture combined with other therapies                     |
| 207 | Randomized Controlled Clinical Meta-analysis of Acupuncture and Moxibustion for Treatment of Infantile Cerebral Palsy        | Yuan Jinmei  | 2015 | Acupuncture interventions did not meet the inclusion criteria |
| 208 | Evaluation of the Clinical Effect of Traditional Chinese Medicine on Abducens Paralysis Based on Meta-analysis               | Ren Wei      | 2017 | Acupuncture interventions did not meet the inclusion criteria |
| 209 | Meta-analysis on Random-Control Experiment of Eye-acupuncture on Extrarectus Muscles for the Treatment of Abducens Paralysis | QIN Xinzhang | 2016 | Acupuncture interventions did not meet the inclusion criteria |
| 210 | A Meta-analysis of Randomized Controlled Trials of Electroacupuncture Treatment for Trigeminal Neuralgia                     | ZHOU Jie     | 2017 | Acupuncture combined with other therapies                     |
| 211 | Meta-analysis of Literature on Acupuncture and Moxibustion therapy in Trigeminal Neuralgia                                   | Gao Chunmei  | 2016 | Acupuncture combined with other therapies                     |
| 212 | A Systematic Review of Acupuncture for Chemotherapy-Induced Peripheral Neuropathy.                                           | Li, K        | 2019 | Acupuncture interventions did not meet the inclusion criteria |
| 213 | Meta-analysis of Electroacupuncture for Chemotherapy-Induced Peripheral Neuropathy                                           | KUANG Biyao  | 2019 | Acupuncture interventions did not meet the inclusion criteria |

|     |                                                                                                                                                |              |      |                                                               |
|-----|------------------------------------------------------------------------------------------------------------------------------------------------|--------------|------|---------------------------------------------------------------|
|     |                                                                                                                                                |              |      | usion criteria                                                |
| 214 | Meta-analysis of Clinical Study on Electroacupuncture Treatment of Diabetic Peripheral Neuropathy                                              | Zheng Haizhu | 2020 | No patient important outcome                                  |
| 215 | Acupuncture for the Treatment of Lower Limb Diabetic Peripheral Neuropathy: a Systematic Review.                                               | Nash, J      | 2019 | No meta-analysis                                              |
| 216 | Meta-analysis of the Effect of Acupuncture and Moxibustion on the Conduction Velocity of Ulnar Nerve in Diabetic Peripheral Neuropathy         | Zhong Zhen   | 2019 | Acupuncture combined with other therapies                     |
| 217 | A Meta-analysis on the Effect of Acupuncture on Tibial Nerve in Diabetic Peripheral Neuropathy                                                 | MA Shiqi     | 2019 | Acupuncture combined with other therapies                     |
| 218 | Meta-analysis and Test Sequential Analysis on the Effect of Acupuncture on Diabetic Peripheral Neuropathy                                      | He Jianbin   | 2019 | Acupuncture interventions did not meet the inclusion criteria |
| 219 | A Meta-analysis of the Effect of Auricular Pressing on Diabetic Peripheral Neuropathy                                                          | LI Ming-zhe  | 2019 | Acupuncture combined with other therapies                     |
| 220 | Influence of Acupuncture-Moxibustion on the Peroneal Nerve Conduction Velocity in Type 2 Diabetic Peripheral Neuropathy: A Meta-analysis       | LIU Ji-qin   | 2016 | No patient important outcome                                  |
| 221 | Acupuncture for the Treatment of Peripheral Neuropathy: A Systematic Review and Meta-analysis.                                                 | Dimitrova, A | 2017 | Acupuncture combined with other therapies                     |
| 222 | The Effectiveness of Acupuncture in the Management of Persistent Regional Myofascial Head and Neck Pain: A Systematic Review and Meta-analysis | Farag, A M   | 2020 | No meta-analysis                                              |
| 223 | Meta-analysis of the Effect of Dry Acupuncture on the Trigger Point of Upper Trapezius Myofascial Pain                                         | Liu Lin      | 2015 | Acupuncture interventions did not meet the inclusion criteria |

|     |                                                                                                                                                                            |               |      |                                                               |
|-----|----------------------------------------------------------------------------------------------------------------------------------------------------------------------------|---------------|------|---------------------------------------------------------------|
| 224 | The Effect of Acupuncture on Postoperative Pain, Nausea and Vomiting after Pediatric Tonsillectomy: a Systematic Review.                                                   | Pouy, S       | 2019 | No meta-analysis                                              |
| 225 | The Effectiveness of Pc6 Acupuncture in the Prevention of Postoperative Nausea and Vomiting in Children- A Systematic Review and Meta-analysis.                            | Zhang, Y      | 2020 | Control interventions did not meet the inclusion criteria     |
| 226 | The Effect of Acupuncture on Postoperative Nausea and Vomiting after Pediatric Tonsillectomy: A Meta-analysis and Systematic Review.                                       | Shin, H C     | 2016 | Acupuncture combined with other therapies                     |
| 227 | Transcutaneous Electrical Acupoint Stimulation for Preventing Postoperative Nausea and Vomiting after General Anesthesia: A Meta-analysis of Randomized Controlled Trials. | Chen, J       | 2020 | No meta-analysis                                              |
| 228 | Acupuncture therapy on Postoperative Nausea and Vomiting in Abdominal Operation: A Bayesian Network Meta-analysis.                                                         | Fu, C         | 2020 | Acupuncture combined with other therapies                     |
| 229 | Non-Needle Acupoint Stimulation for Prevention of Nausea and Vomiting after Breast Surgery: A Meta-analysis.                                                               | Sun, R        | 2019 | No patient important outcome                                  |
| 230 | Ear Acupuncture therapy in Preventing Postoperative Nausea and Emesis: A Systematic Review and Meta-analysis of Rct                                                        | GAO Yanyu     | 2017 | Acupuncture interventions did not meet the inclusion criteria |
| 231 | Can Perioperative Acupuncture Reduce the Pain and Vomiting Experienced after Tonsillectomy? A Meta-analysis.                                                               | Cho, H K      | 2016 | Acupuncture combined with other therapies                     |
| 232 | Clinical Observation on Electroacupuncture Pre-Treatment for Delayed Vomiting Caused by Chemotherapy after Breast Cancer Operation                                         | Huang Kejiang | 2016 | Acupuncture interventions did not meet the inclusion criteria |
| 233 | Meta-analysis on Postoperative Complications of Wristband Acupoint Pressure therapy.                                                                                       | Zhang, G L    | 2015 | Full text unavailable                                         |
| 234 | The Effect of Acupuncture on Postoperative                                                                                                                                 | Pouy, S       | 2019 | No meta-an                                                    |



|     |                                                                                                                                                     |                |      |                                                    |
|-----|-----------------------------------------------------------------------------------------------------------------------------------------------------|----------------|------|----------------------------------------------------|
|     | ve Pain, Nausea and Vomiting after Pediatric Tonsillectomy: a Systematic Review.                                                                    |                |      | alysis                                             |
| 235 | Systematic Evaluation and Meta-analysis of the Improvement of Pain and Function after Total Knee Replacement by Percutaneous Electrical Stimulation | LI Kai-min g   | 2019 | Acupuncture combined with other therapies          |
| 236 | Meta-analysis of Auricular Acupoint Pressing therapy for Postoperative Pain in Fractures                                                            | ZHANG Ya qian  | 2019 | Acupuncture combined with other therapies          |
| 237 | Effect of Auricular Plaster therapy on Postoperative Pain and Functional Recovery after Total Hip Arthroplasty: A Meta-analysis                     | Li Haiyang     | 2019 | Acupuncture combined with other therapies          |
| 238 | Systematic Review of Three Electrical Stimulation Techniques for Rehabilitation after Total Knee Arthroplasty.                                      | Yue, C         | 2018 | No meta-analysis                                   |
| 239 | The Effect of Auricular Acupressure/Sticking therapy on Pain Relief after Total Hip Or Knee Replacement: a Systematic Review                        | Zhang Qian kun | 2018 | Acupuncture combined with other therapies          |
| 240 | A Systematic Evaluation of the Effect of Point Massage on Relieving Shoulder Pain after Laparoscopic Surgery                                        | Yang Lin       | 2017 | Acupuncture combined with other therapies          |
| 241 | The Efficacy of Acupuncture in Post-Operative Pain Management: A Systematic Review and Meta-analysis.                                               | Wu, M S        | 2016 | No detailed information on intervention or outcome |
| 242 | Electrical Stimulation and Recovery of Gastrointestinal Function Following Surgery: A Systematic Review.                                            | Penfold, J A   | 2019 | Acupuncture combined with other therapies          |
| 243 | Effect of Auricular Point Sticking on Recovery of Gastrointestinal Function after Gynecological Laparoscopic Surgery: a Meta-analysis               | Zhai Tian-tian | 2019 | Acupuncture combined with other therapies          |
| 244 | Meta-analysis of the Effect of Auricular Point Sticking Pressure on Abdominal Distension Relief of Patients with Laparoscopic Surgery in Gynecology | HU Shunan      | 2019 | Acupuncture combined with other therapies          |
| 245 | A Meta-analysis of Randomized Controlled Trials of Acupuncture and Moxibustion                                                                      | LI Chao        | 2019 | Acupuncture combined                               |

|     |                                                                                                                                                             |                 |      |                                                               |
|-----|-------------------------------------------------------------------------------------------------------------------------------------------------------------|-----------------|------|---------------------------------------------------------------|
|     | for Postoperative Gastroparesis                                                                                                                             |                 |      | with other therapies                                          |
| 246 | A Meta-analysis of the Effect of Acupoint Massage in Prevention of Gastrointestinal Complications after Laparoscopic Surgery in Adults                      | YE Chunxiang    | 2019 | Acupuncture interventions did not meet the inclusion criteria |
| 247 | Meta-analysis of Simple Acupuncture to Promote Postoperative Abdominal Gastrointestinal Dysfunction Recovery                                                | Wang Shiyuan    | 2018 | Acupuncture combined with other therapies                     |
| 248 | Efficacy and Safety of Acupuncture Intervention in the Recovery of Gastrointestinal Function after Gynecological and Obstetric Surgery: A Systematic Review | Wang Youping    | 2018 | No patient important outcome                                  |
| 249 | Effectiveness of Acupuncture in Postoperative Ileus: a Systematic Review and Meta-analysis                                                                  | Bik, Cheong Kah | 2016 | No patient important outcome                                  |
| 250 | A Systematic Review and Meta-analysis of Acupuncture on Postoperative Ileus                                                                                 | Li Jinjin       | 2015 | Acupuncture combined with other therapies                     |
| 251 | Meta-analysis of Randomized Controlled Clinical Studies on Acupuncture for Postoperative Intestinal Obstruction                                             | Ma Yufeng       | 2015 | No patient important outcome                                  |
| 252 | Effects of Acupuncture in Anesthesia for Craniotomy: A Meta-analysis.                                                                                       | Asmussen, S     | 2017 | Acupuncture combined with other therapies                     |
| 253 | Systematic Review and Meta-analysis on the Effectiveness of Acupuncture and Moxibustion in the Treatment of Postpartum Lactation                            | Zhou Lan        | 2019 | Acupuncture interventions did not meet the inclusion criteria |
| 254 | Meta-analysis of the Effect of Embedding Bean in Ear Acupoint on Lactation after Cesarean Section                                                           | Han Tinxia      | 2018 | Acupuncture combined with other therapies                     |
| 255 | Effects of Auricular Plaster therapy and Use of Time on Postpartum Lactation: A Meta-analysis                                                               | Tang Ying       | 2017 | Acupuncture combined with other therapies                     |

|     |                                                                                                                                                                              |                |      |                                                               |
|-----|------------------------------------------------------------------------------------------------------------------------------------------------------------------------------|----------------|------|---------------------------------------------------------------|
| 256 | Impact of Acupressure on Onset of Labour and Labour Duration: A Systematic Review.                                                                                           | Mollart, L J   | 2015 | No meta-analysis                                              |
| 257 | Acupuncture At Zusanli (St36) for Experimental Sepsis: A Systematic Review.                                                                                                  | Lai, F         | 2020 | No meta-analysis                                              |
| 258 | Efficacy and Safety of Acupuncture on Sepsis: a Systematic Review                                                                                                            | TANG Yidan     | 2020 | Acupuncture interventions did not meet the inclusion criteria |
| 259 | Systematic Evaluation and Meta-analysis of the Improvement of Pain and Function after Total Knee Replacement by Percutaneous Electrical Stimulation                          | LI Kai-min g   | 2019 | Acupuncture combined with other therapies                     |
| 260 | Systematic Review of Three Electrical Stimulation Techniques for Rehabilitation after Total Knee Arthroplasty.                                                               | Yue, C         | 2018 | No meta-analysis                                              |
| 261 | The Effect of Auricular Acupressure/Sticking therapy on Pain Relief after Total Hip Or Knee Replacement: a Systematic Review                                                 | Zhang Qian kun | 2018 | Acupuncture combined with other therapies                     |
| 262 | Effect of Auricular Plaster therapy on Postoperative Pain and Functional Recovery after Total Hip Arthroplasty: A Meta-analysis                                              | Li Haiyang     | 2019 | Acupuncture combined with other therapies                     |
| 263 | The Effect of Different Acupuncture therapies on Neurological Recovery in Spinal Cord Injury: A Systematic Review and Network Meta-analysis of Randomized Controlled Trials. | Xiong, F       | 2019 | Acupuncture combined with other therapies                     |
| 264 | Acupuncture Treatment for Urinary Retention Following Spinal Cord Injury: A Meta-analysis                                                                                    | Cheng Jie      | 2018 | Acupuncture combined with other therapies                     |
| 265 | Efficacy of Acupuncture and Moxibustion for Neurogenic Bladder in Patients with Spinal Cord Injury: A Meta-analysis                                                          | Wan Dengfeng   | 2018 | No patient important outcome                                  |
| 266 | Acupuncture for the Effect and Safety of Neurogenic Bladder after Spinal Cord Injury: A Meta-analysis                                                                        | FAN Xiao       | 2017 | Acupuncture combined with other therapies                     |
| 267 | The Impact of Acupuncture on Neurological Recovery in Spinal Cord Injury: A S                                                                                                | Ma, R          | 2015 | Acupuncture combined                                          |

|     |                                                                                                                                         |               |      |                                                               |
|-----|-----------------------------------------------------------------------------------------------------------------------------------------|---------------|------|---------------------------------------------------------------|
|     | ystematic Review and Meta-analysis.                                                                                                     |               |      | with other therapies                                          |
| 268 | Network Meta-analysis on Effectiveness of Fire Needle, Warm Acupuncture, and Electroacupuncture in the Treatment of Knee Osteoarthritis | Zhang Jinhuan | 2020 | Acupuncture interventions did not meet the inclusion criteria |
| 269 | Meta-analysis of Fu's Subcutaneous Needling therapy for Knee Osteoarthritis                                                             | SONG Xiang    | 2019 | Control interventions did not meet the inclusion criteria     |
| 270 | Meta-analysis of Safety and Effectiveness of Floating Needle therapy in Treating Knee Osteoarthritis                                    | LIU Wan-Jun   | 2019 | Control interventions did not meet the inclusion criteria     |
| 271 | Meta-analysis of Clinical Effect of Acupuncture and Moxibustion on Osteoarthritis/Osteodystrophy                                        | Feng Peng     | 2019 | Acupuncture interventions did not meet the inclusion criteria |
| 272 | Meta-analysis of the Effect of Acupuncture and Western Medicine on Knee Osteoarthritis/Osteodystrophy                                   | Hao Huirui    | 2018 | Acupuncture combined with other therapies                     |
| 273 | Effect of Electroacupuncture on Knee Osteoarthritis: A Systematic Review                                                                | LIN Jie       | 2016 | Acupuncture combined with other therapies                     |
| 274 | Meta-analysis of the therapeutic Effect of Treating Osteoarthritis with Filiform Needle                                                 | MA Jia-jian   | 2016 | Acupuncture combined with other therapies                     |
| 275 | Meta-analysis of Acupuncture and Moxibustion for Treatment of Osteoarthritis/Osteodystrophy                                             | Hu Hanjiao    | 2016 | Acupuncture interventions did not meet the inclusion criteria |
| 276 | Acupuncture for Obstructive Sleep Apnea (Osa) in Adults: A Systematic Review                                                            | Wang, L       | 2020 | Acupuncture intervention                                      |

|     |                                                                                                                                                         |                |      |                                                               |
|-----|---------------------------------------------------------------------------------------------------------------------------------------------------------|----------------|------|---------------------------------------------------------------|
|     | nd Meta-analysis                                                                                                                                        |                |      | s did not meet the inclusion criteria                         |
| 277 | Effects of Acupuncture on Tinnitus Treating: A Systematic Review and Meta-analysis                                                                      | ZHANG Ze<br>yu | 2018 | Acupuncture interventions did not meet the inclusion criteria |
| 278 | Non-Pharmacologic Treatments for Symptoms of Diabetic Peripheral Neuropathy: a Systematic Review.                                                       | Amato, N.<br>S | 2019 | Acupuncture interventions did not meet the inclusion criteria |
| 279 | Effects of Acupuncture on Luteinized Unruptured Follicle Syndrome: A Meta-analysis of Randomized Controlled Trials                                      | Liu, X         | 2020 | No patient important outcome                                  |
| 280 | Complementary and Alternative Medicine Treatment Options for Otitis Media: A Systematic Review.                                                         | Marom, T       | 2016 | No meta-analysis                                              |
| 281 | Clinical Effect of Acupuncture therapy on Obstructive Sleep Apnea Hypopnea Syndrome: a Meta-analysis                                                    | JIAO Su-qin    | 2018 | No patient important outcome                                  |
| 282 | The Clinical Effect of Acupuncture in the Treatment of Obstructive Sleep Apnea: A Systematic Review and Meta-analysis of Randomized Controlled Trials.  | Lv, Z T        | 2016 | Acupuncture interventions did not meet the inclusion criteria |
| 283 | Effectiveness of Acupuncturing At the Sphenopalatine Ganglion Acupoint Alone for Treatment of Allergic Rhinitis: A Systematic Review and Meta-analysis. | Fu, Qinwei     | 2019 | Control interventions did not meet the inclusion criteria     |
| 284 | Acupuncture for Allergic Rhinitis: a Systematic Review and Meta-analysis                                                                                | Liu Jie        | 2016 | Control interventions did not meet the inclusion criteria     |
| 285 | Systematic Review and Meta-analysis of the Randomized Controlled Trial of Acupuncture for Allergic Rhinitis                                             | QU Shu-han     | 2016 | Acupuncture interventions did not meet the inclusion criteria |

|     |                                                                                                                                                                         |              |      |                                                               |
|-----|-------------------------------------------------------------------------------------------------------------------------------------------------------------------------|--------------|------|---------------------------------------------------------------|
|     |                                                                                                                                                                         |              |      | meet the inclusion criteria                                   |
| 286 | Acupuncture of Sphenopalatine Ganglion in the Treatment of Allergic Rhinitis: a Systematic Review                                                                       | Chen Lihe    | 2016 | Acupuncture interventions did not meet the inclusion criteria |
| 287 | Acupuncture and Moxibustion for the Treatment of Allergic Rhinitis: A Meta-analysis                                                                                     | LIANG Chao   | 2015 | Control interventions did not meet the inclusion criteria     |
| 288 | Meta-analysis of Acupuncture Treatment for Sudden Deafness                                                                                                              | ZHA Bixiang  | 2019 | Control interventions did not meet the inclusion criteria     |
| 289 | Evaluation of Effect of Acupuncture and Moxibustion and Level of Intervention Based on Cumulative Meta-analysis and Fuzzy Comprehensive Evaluation: Sudden Hearing Loss | LI Bo        | 2016 | No patient important outcome                                  |
| 290 | Acupuncture for the Treatment of Sudden Sensorineural Hearing Loss: A Systematic Review and Meta-analysis: Acupuncture for Ssnhl.                                       | Chen, S      | 2019 | No patient important outcome                                  |
| 291 | Acupuncture therapy for Sudden Sensorineural Hearing Loss: a Systematic Review and Meta-analysis of Randomized Controlled Trials.                                       | Zhang, XC    | 2015 | Acupuncture combined with other therapies                     |
| 292 | Efficacy and Safety of Acupuncture therapy for Nerve Deafness: a Meta-analysis of Randomized Controlled Trials.                                                         | Jiang, Y     | 2015 | Control interventions did not meet the inclusion criteria     |
| 293 | Systematic Review and Meta-analysis of Acupuncture for the Treatment of Neuroathic Tinnitus                                                                             | SONG Hualong | 2018 | No patient important outcome                                  |
| 294 | Systematic Review of Acupuncture Treatment of Tinnitus                                                                                                                  | Xie Hui      | 2018 | Control interventions did not meet the inclusion              |

|     |                                                                                                                                        |               |      |                                                               |
|-----|----------------------------------------------------------------------------------------------------------------------------------------|---------------|------|---------------------------------------------------------------|
|     |                                                                                                                                        |               |      | n criteria                                                    |
| 295 | Meta-analysis of Acupuncture and Moxibustion Treatment of Tinnitus Randomized Controlled Trial                                         | Nie Hongmei   | 2016 | No patient important outcome                                  |
| 296 | The Meta-analysis of Tinnitus on Randomized Controlled Clinical Trials of Acupuncture Treatment                                        | Meng Dan      | 2016 | No patient important outcome                                  |
| 297 | Systematic Review of Clinical Research on Acupuncture and Moxibustion Treatment of Tinnitus                                            | Ji Jun        | 2016 | No patient important outcome                                  |
| 298 | Systematic Review of Acupuncture and Hyperthyroidism therapy                                                                           | Wang Guang-an | 2018 | Acupuncture interventions did not meet the inclusion criteria |
| 299 | Meta-analysis of Clinical Study on Electroacupuncture Treatment of Diabetic Peripheral Neuropathy                                      | Zheng Haizhu  | 2020 | Acupuncture interventions did not meet the inclusion criteria |
| 300 | Acupuncture for the Treatment of Lower Limb Diabetic Peripheral Neuropathy: a Systematic Review.                                       | Nash, J       | 2019 | No meta-analysis                                              |
| 301 | Meta-analysis of the Effect of Acupuncture and Moxibustion on the Conduction Velocity of Ulnar Nerve in Diabetic Peripheral Neuropathy | Zhong Zhen    | 2019 | Acupuncture interventions did not meet the inclusion criteria |
| 302 | A Meta-analysis on the Effect of Acupuncture on Tibial Nerve in Diabetic Peripheral Neuropathy                                         | MA Shiqi      | 2019 | Acupuncture interventions did not meet the inclusion criteria |
| 303 | Meta-analysis and Test Sequential Analysis on the Effect of Acupuncture on Diabetic Peripheral Neuropathy                              | He Jianbin    | 2019 | Acupuncture combined with other therapies                     |
| 304 | A Meta-analysis of the Effect of Auricular Pressing on Diabetic Peripheral Neuropathy                                                  | LI Ming-zhe   | 2019 | Acupuncture combined with other therapies                     |

|     |                                                                                                                                          |              |      |                                                               |
|-----|------------------------------------------------------------------------------------------------------------------------------------------|--------------|------|---------------------------------------------------------------|
|     |                                                                                                                                          |              |      | herapies                                                      |
| 305 | Influence of Acupuncture-Moxibustion on the Peroneal Nerve Conduction Velocity in Type 2 Diabetic Peripheral Neuropathy: A Meta-analysis | LIU Ji-qin   | 2016 | No patient important outcome                                  |
| 306 | Meta-analysis and Treatment Strategy of Acupuncture in the Treatment of Diabetic Peripheral Neuropathy                                   | XU Chang     | 2016 | No patient important outcome                                  |
| 307 | Influence on Acupuncture Treatment of Diabetic Peripheral Neuropathy-a Systematic Review of Randomized Controlled Trials                 | Li Jun       | 2015 | No patient important outcome                                  |
| 308 | Effects and Safety of Acupuncture for Diabetes: a Systematic Review and Meta-analysis                                                    | Yi, Li-Juan  | 2016 | No patient important outcome                                  |
| 309 | Systematic Review and Meta-Regression Analysis of Acupuncture for Diabetic Nephropathy                                                   | Jia Ying     | 2019 | No patient important outcome                                  |
| 310 | A Systematic Review of Acupuncture on Diabetic Kidney Disease                                                                            | WANG Anna    | 2019 | Acupuncture combined with other therapies                     |
| 311 | Systematic Evaluation of Acupuncture Treating Diabetic Retinopathy                                                                       | GUAN Mingdan | 2019 | Acupuncture combined with other therapies                     |
| 312 | Acupuncture for Management of Type 2 Diabetic Gastroparesis: a Meta-analysis                                                             | CHEN Ya-jun  | 2018 | Acupuncture interventions did not meet the inclusion criteria |
| 313 | System Evaluation and Meta-analysis of Auricular Plaster Intervention for Diabetic Gastroparesis Patients                                | Xu Huiwen    | 2016 | Acupuncture interventions did not meet the inclusion criteria |
| 314 | Meta-analysis of Acupuncture Treatment of Type 2 Diabetes Mellitus and Depression Clinical Research                                      | Liu Meijun   | 2016 | Acupuncture combined with other therapies                     |
| 315 | Auricular Plaster therapy for Improving Sleep in Patients with Diabetes Mellitus and Insomnia: A Systematic Review                       | Jiang Yuting | 2016 | Acupuncture interventions did not meet                        |



|     |                                                                                                                  |               |      |                                                               |
|-----|------------------------------------------------------------------------------------------------------------------|---------------|------|---------------------------------------------------------------|
|     |                                                                                                                  |               |      | meet the inclusion criteria                                   |
| 316 | Systematic Review and Meta-analysis on Acupuncture for Obesity Complicated with Type 2 Diabetes Mellitus         | WANG Lihua    | 2018 | Acupuncture interventions did not meet the inclusion criteria |
| 317 | Meta-analysis on the therapeutic Effect of Acupuncture and Moxibustion on Obesity of Type 2 Diabetes Mellitus    | Lin Juan      | 2016 | Acupuncture interventions did not meet the inclusion criteria |
| 318 | Systematic Review of Auricular Point therapy for Type 2 Diabetes Mellitus: A Meta-analysis                       | Piao Chunli   | 2020 | No patient important outcome                                  |
| 319 | Acupuncture for Type 2 Diabetes Mellitus: A Systematic Review and Meta-analysis of Randomized Controlled Trials. | Chen, C       | 2019 | No patient important outcome                                  |
| 320 | A Meta-analysis on the Effect of Acupoint Massage on Type 2 Diabetic Patients                                    | WANG Yan      | 2019 | No meta-analysis                                              |
| 321 | Meta-analysis of Acupuncture on the Pancreas Islet Function of Patients with Type-2 Diabetes                     | XING Guochun  | 2015 | Control interventions did not meet the inclusion criteria     |
| 322 | Systematic Review of Interventional Effect of Acupuncture and Moxibustion on Impaired Glucose Regulation         | SHI Liwei     | 2018 | Acupuncture interventions did not meet the inclusion criteria |
| 323 | Meta-analysis of therapeutic Effect of Acupuncture and Moxibustion on Metabolic Syndrome                         | Guo Shengtong | 2015 | Acupuncture interventions did not meet the inclusion criteria |
| 324 | Randomized Controlled Trials of Auricular Point for Hyperlipidemia: A Meta-analysis                              | LI Huan       | 2017 | No patient important outcome                                  |
| 325 | Effectiveness and Safety of Acupuncture                                                                          | LIU Mailan    | 2015 | No patient i                                                  |

|     |                                                                                                                        |              |      |                                                               |
|-----|------------------------------------------------------------------------------------------------------------------------|--------------|------|---------------------------------------------------------------|
|     | and Moxibustion for Hyperlipidemia: A Systematic Review                                                                |              |      | important outcome                                             |
| 326 | Acupuncture for Glaucoma.                                                                                              | Law, S K     | 2020 | No meta-analysis                                              |
| 327 | Optimizing Acupuncture Treatment for Dry Eye Syndrome: a Systematic Review.                                            | Kim, B H     | 2018 | Acupuncture interventions did not meet the inclusion criteria |
| 328 | Meta-analysis on Acupuncture for Dry Eyes Based on the Clinical Literatures: a Randomized Controlled Trial             | SHENG Xueyan | 2015 | Acupuncture interventions did not meet the inclusion criteria |
| 329 | Acupuncture for Acute Hordeolum                                                                                        | Cheng, Ke    | 2017 | Acupuncture interventions did not meet the inclusion criteria |
| 330 | Meta-analysis of Auricular Acupressure therapy in Intervention of Juvenile Myopia                                      | XU Baisheng  | 2019 | Acupuncture interventions did not meet the inclusion criteria |
| 331 | Effectiveness of Acupuncture for Juvenile Myopia: A Systematic Assessment                                              | FU Tian      | 2017 | Control interventions did not meet the inclusion criteria     |
| 332 | Meta-analysis on Acupuncture Treatment of Diplopia                                                                     | Ding Yapeng  | 2018 | Acupuncture combined with other therapies                     |
| 333 | Meta-analysis of the Effect of Acupuncture and Moxibustion on Uveitis                                                  | Wu Hanqing   | 2015 | No patient important outcome                                  |
| 334 | Meta-analysis of Acupuncture As Adjuvant therapy in Improving Gastrointestinal Function of Acute Pancreatitis Patients | LIU Hong     | 2017 | Acupuncture combined with other therapies                     |

|     |                                                                                                                  |              |      |                                                               |
|-----|------------------------------------------------------------------------------------------------------------------|--------------|------|---------------------------------------------------------------|
| 335 | Meta-analysis on Acupuncture and Moxibustion in the Treatment of Inflammatory Bowel Disease                      | WANG Yuan    | 2018 | Acupuncture interventions did not meet the inclusion criteria |
| 336 | Clinical Efficacy Differences in Ulcerative Colitis Between Acupuncture and Salazosulfapyridine: A Meta-analysis | LIU Zhao     | 2016 | Acupuncture interventions did not meet the inclusion criteria |
| 337 | Systematic Review of Complementary and Alternative Medicine Treatments in Inflammatory Bowel Diseases.           | Langhorst, J | 2015 | No meta-analysis                                              |
| 338 | Acupuncture for Chronic Hepatitis B.                                                                             | Kong, Z      | 2019 | Acupuncture interventions did not meet the inclusion criteria |
| 339 | [Acupuncture for Diarrhea-Predominant Irritable Bowel Syndrome: a Meta-analysis].                                | Deng,D       | 2017 | Acupuncture interventions did not meet the inclusion criteria |
| 340 | Meta-analysis of Acupuncture in Treatment of Irritable Bowel Syndrome                                            | LI Rui-gen   | 2016 | Acupuncture interventions did not meet the inclusion criteria |
| 341 | Systematic Review of Acupuncture therapies for Irritable Bowel Syndrome                                          | XU Guixin    | 2016 | Acupuncture interventions did not meet the inclusion criteria |
| 342 | Systematic Review of Auricular Plaster therapy for Prevention and Treatment of Opioid Induced Constipation       | DING Weibin  | 2020 | Acupuncture interventions did not meet the inclusion criteria |

|     |                                                                                                                    |             |      |                                                               |
|-----|--------------------------------------------------------------------------------------------------------------------|-------------|------|---------------------------------------------------------------|
|     |                                                                                                                    |             |      | a                                                             |
| 343 | Meta-analysis of Acupuncture and Moxibustion in the Treatment of Functional Constipation                           | MA Kun      | 2019 | Control interventions did not meet the inclusion criteria     |
| 344 | Effects of Ear-acupressure in Treatment of Constipation: a Systematic Review                                       | LUO Chunmei | 2017 | No patient important outcome                                  |
| 345 | Meta-analysis of Randomized Controlled Clinical Studies on Acupuncture and Moxibustion for Constipation            | Li Xue      | 2016 | Acupuncture interventions did not meet the inclusion criteria |
| 346 | Auricular-Plaster therapy for Chronic Functional Constipation: A Meta-analysis of Randomized Controlled Trial      | Wu Yuanrong | 2016 | No patient important outcome                                  |
| 347 | Efficacy and Safety of Acupuncture for the Treatment of Functional Dyspepsia: Meta-analysis.                       | Zhou, W     | 2016 | Acupuncture interventions did not meet the inclusion criteria |
| 348 | The Effect of Acupuncture and Moxibustion on Functional Dyspepsia Compared with Prokinetic Agents: a Meta-analysis | WU Xiao-wei | 2015 | Acupuncture interventions did not meet the inclusion criteria |
| 349 | Meta-analysis of Acupuncture Treatment of Peptic Ulcer                                                             | Hu Shixiu   | 2019 | Acupuncture interventions did not meet the inclusion criteria |
| 350 | Meta-analysis of Curative Effect Comparison Between Acupuncture and Western Medicine on Chronic Gastritis          | Wang Junlin | 2016 | Acupuncture interventions did not meet the inclusion criteria |
| 351 | Meta-analysis on Acupuncture in Treatment of Chronic Atrophic Gastritis                                            | XIANG Juan  | 2016 | Acupuncture intervention                                      |

|     |                                                                                                                                                                                             |             |      |                                                               |
|-----|---------------------------------------------------------------------------------------------------------------------------------------------------------------------------------------------|-------------|------|---------------------------------------------------------------|
|     |                                                                                                                                                                                             |             |      | s did not meet the inclusion criteria                         |
| 352 | Gastroesophageal Reflux Disease Treated with Acupoint Pointer therapy of Tcm: A Meta-analysis                                                                                               | LI Jianfeng | 2019 | Acupuncture interventions did not meet the inclusion criteria |
| 353 | Efficacy of Acupuncture therapy on Gastrointestinal Dysfunction in Patients with Non-Gastrointestinal Diseases: a Systematic Review and Meta-analysis Based on Randomized Controlled Trials | HOU Ya-hong | 2017 | Acupuncture combined with other therapies                     |
| 354 | Meta-analysis of Acupuncture Treatment for Gastrointestinal Reaction after Chemotherapy of Tumor                                                                                            | HU Ya-cai   | 2017 | No patient important outcome                                  |
| 355 | Acupuncture St25 Treatment for Chronic Diarrhea: A Systematic Evaluation and Meta-analysis                                                                                                  | QIN Zongshi | 2015 | Control interventions did not meet the inclusion criteria     |
| 356 | Effects of Acupuncture in Patients with Chronic Kidney Disease: a Systematic Review.                                                                                                        | Mela, GAA   | 2020 | No meta-analysis                                              |
| 357 | Acupuncture for Infertile Women Without Undergoing Assisted Reproductive Techniques (Art): A Systematic Review and Meta-analysis.                                                           | Yun, L      | 2019 | Acupuncture interventions did not meet the inclusion criteria |
| 358 | Acupuncture in Improving Endometrial Receptivity: a Systematic Review and Meta-analysis.                                                                                                    | Zhong, Y    | 2019 | Acupuncture interventions did not meet the inclusion criteria |
| 359 | Effect of Acupuncture on Ovulatory Dysfunction Infertility: A Systematic Review                                                                                                             | TAN Yu-qing | 2019 | Acupuncture combined with other therapies                     |
| 360 | Acupuncture in Treatment of Fallopian Tube Obstructive Infertility: A Systematic                                                                                                            | HU Yujiao   | 2018 | Acupuncture intervention                                      |

|     |                                                                                                                                          |               |      |                                                               |
|-----|------------------------------------------------------------------------------------------------------------------------------------------|---------------|------|---------------------------------------------------------------|
|     | Review and Meta-analysis                                                                                                                 |               |      | s did not meet the inclusion criteria                         |
| 361 | A Meta-analysis on the Clinical Study of Acupuncture in Treating Infertility                                                             | LIU Tao       | 2018 | Acupuncture interventions did not meet the inclusion criteria |
| 362 | Meta-analysis of Acupuncture-Moxibustion in Treatment of Anovulation Infertility                                                         | AI Xiao       | 2017 | Acupuncture interventions did not meet the inclusion criteria |
| 363 | Efficacy and Safety of Acupuncture for the Treatment of Oligoasthenozoospermia: A Systematic Review.                                     | You, F        | 2020 | No meta-analysis                                              |
| 364 | The Effects of Acupuncture on Pregnancy Outcomes of in Vitro Fertilization with Embryo Transfer: An Interdisciplinary Systematic Review. | Gu, Y E       | 2019 | No meta-analysis                                              |
| 365 | Therapeutic Effect of Acupuncture on the Outcomes of in Vitro Fertilization: a Systematic Review and Meta-analysis.                      | Verastegui, C | 2017 | Full text unavailable                                         |
| 366 | Long-Term Effects of Acupuncture for Chronic Prostatitis/Chronic Pelvic Pain Syndrome: Systematic Review and Single-arm Meta-analyses.   | Qin, Z        | 2019 | No detailed information on intervention or outcome            |
| 367 | Meta-analysis of the Effects of Acupuncture for Chronic Prostatitis                                                                      | AO Jin-bo     | 2018 | No detailed information on intervention or outcome            |
| 368 | Comparison of the Efficacy of Acupuncture and Western Medicine Treatment on Chronic Prostatitis in China: Meta-analysis                  | YU Li-Zhong   | 2017 | No patient important outcome                                  |
| 369 | Meta-analysis of Acupuncture Treatment of Chronic Prostatitis                                                                            | PANG Yong     | 2016 | Acupuncture interventions did not meet the inclusion criteria |

|     |                                                                                                                            |                 |      |                                                               |
|-----|----------------------------------------------------------------------------------------------------------------------------|-----------------|------|---------------------------------------------------------------|
|     |                                                                                                                            |                 |      | a                                                             |
| 370 | Meta-analysis on Acupuncture in Treating Chronic Prostatitis                                                               | HE Yuan         | 2015 | No detailed information on intervention or outcome            |
| 371 | Evaluation of Acupuncture in Treating Benign Prostatic Hyperplasia                                                         | CHAI Qiqi       | 2018 | Acupuncture combined with other therapies                     |
| 372 | Complementary therapies for Bladder Pain Syndrome: a Systematic Review.                                                    | Verghese, T S   | 2016 | No meta-analysis                                              |
| 373 | Meta-analysis of Clinical Efficacy of Acupuncture Versus Drugs in the Treatment of Renal Colic                             | HUANG Yi-yu     | 2020 | Acupuncture interventions did not meet the inclusion criteria |
| 374 | Meta-analysis on the Clinical Effect of Acupuncture and Moxibustion in the Treatment of Female Stress Urinary Incontinence | CHEN Yali       | 2020 | Acupuncture interventions did not meet the inclusion criteria |
| 375 | A Meta-analysis of Treating Female Stress Urinary Incontinence by Acupuncture                                              | Zhang Yan       | 2016 | Acupuncture interventions did not meet the inclusion criteria |
| 376 | Clinical Studies on Incontinence Treated by Electroacupuncture: a Meta-analysis                                            | Zhang Jiaping   | 2018 | Control interventions did not meet the inclusion criteria     |
| 377 | A Systematic Review and Meta-analysis of Acupuncture for Urolithiasis                                                      | Zhang Mingqiang | 2019 | Acupuncture interventions did not meet the inclusion criteria |
| 378 | Acupuncture Treatment for Chronic Pelvic Pain in Women: A Systematic Review and Meta-analysis of Randomized Controlled     | Sung, S H       | 2018 | Acupuncture interventions did not meet                        |

|     |                                                                                                                                                         |                |      |                                                               |
|-----|---------------------------------------------------------------------------------------------------------------------------------------------------------|----------------|------|---------------------------------------------------------------|
|     | ed Trials.                                                                                                                                              |                |      | meet the inclusion criteria                                   |
| 379 | Systematic Review and Meta-analysis of Complementary Treatments for Women with Symptomatic Endometriosis.                                               | Mira, TAA      | 2018 | No meta-analysis                                              |
| 380 | Acupuncture for Polycystic Ovarian Syndrome.                                                                                                            | Lim, CED       | 2019 | No patient important outcome                                  |
| 381 | Acupuncture for Polycystic Ovarian Syndrome: A Systematic Review and Meta-analysis.                                                                     | Jo, J          | 2017 | No patient important outcome                                  |
| 382 | Acupuncture for Treating Polycystic Ovary Syndrome: Guidance for Future Randomized Controlled Trials.                                                   | Wu, Y          | 2016 | No patient important outcome                                  |
| 383 | Transcutaneous Electrical Nerve Stimulation (TENS) for Pain Management in Sickle Cell Disease.                                                          | Pal, S         | 2020 | No meta-analysis                                              |
| 384 | Acupuncture for Cognitive Impairment in Vascular Dementia, Alzheimer's Disease and Mild Cognitive Impairment: A Systematic Review and Meta-analysis     | Lan, J         | 2020 | Full text unavailable                                         |
| 385 | Effectiveness and Safety of Acupuncture for the Treatment of Alzheimer's Disease: A Systematic Review and Meta-analysis.                                | Wang, Y Y      | 2020 | Control interventions did not meet the inclusion criteria     |
| 386 | Effectiveness of Acupuncture for Alzheimer's Disease: An Updated Systematic Review and Meta-analysis.                                                   | Huang, Q       | 2019 | Control interventions did not meet the inclusion criteria     |
| 387 | Acupuncture and Alzheimer's Disease: A Review of a Meta-analysis.                                                                                       | Quick, Melissa | 2015 | Full text unavailable                                         |
| 388 | The Effectiveness and Safety of Acupuncture for Patients with Alzheimer Disease: a Systematic Review and Meta-analysis of Randomized Controlled Trials. | Zhou, J        | 2015 | Acupuncture interventions did not meet the inclusion criteria |
| 389 | Meta-analysis of Tiaoshen Tongdu Acupuncture in the Treatment of Vascular Dementia                                                                      | Li Fei         | 2019 | Acupuncture interventions did not meet the inclusion criteria |



|     |                                                                                                                           |                 |      |                                                               |
|-----|---------------------------------------------------------------------------------------------------------------------------|-----------------|------|---------------------------------------------------------------|
|     |                                                                                                                           |                 |      | usion criteria                                                |
| 390 | Efficacy Difference of Electro-acupuncture and Nimodipine in the Treatment of Vascular Dementia: A Study of Meta-analysis | WU Jiamin       | 2018 | Control interventions did not meet the inclusion criteria     |
| 391 | A Meta-analysis on Clinical Randomized Controlled Trials of Scalp Electroacupuncture of Vascular Dementia                 | WAN Ting        | 2017 | Control interventions did not meet the inclusion criteria     |
| 392 | Meta-analysis of Acupuncture and Moxibustion in the Treatment of Senile Dementia                                          | Lin Lin         | 2017 | Acupuncture interventions did not meet the inclusion criteria |
| 393 | Meta-analysis: Scalp Treatment of Vascular Dementia                                                                       | GUO Zhenlang    | 2016 | Control interventions did not meet the inclusion criteria     |
| 394 | Systematic Review of Acupuncture for the Treatment of Alcohol Withdrawal Syndrome.                                        | Liu, X          | 2018 | Acupuncture interventions did not meet the inclusion criteria |
| 395 | Systematic Review of Acupuncture therapy for Opioid-Dependence Withdrawal Syndrome                                        | ZHANG Guang-Cai | 2018 | Acupuncture interventions did not meet the inclusion criteria |
| 396 | Meta-analysis of Acupoint Stimulation on Improving Opioid Protracted Withdrawal Symptoms                                  | YANG Jia-xin    | 2016 | Acupuncture interventions did not meet the inclusion criteria |
| 397 | Condition and Effectiveness Evaluation of Acupuncture for Smoking Cessation                                               | LIU Zhao        | 2015 | Acupuncture interventions did not m                           |

|     |                                                                                                                                                    |                  |      |                                                               |
|-----|----------------------------------------------------------------------------------------------------------------------------------------------------|------------------|------|---------------------------------------------------------------|
|     |                                                                                                                                                    |                  |      | meet the inclusion criteria                                   |
| 398 | Meta-analysis of Acupuncture and Moxibustion in the Treatment of Schizophrenia                                                                     | ZHANG Wenzhong   | 2019 | Acupuncture interventions did not meet the inclusion criteria |
| 399 | Acupuncture As Add-on Treatment of the Positive, Negative, and Cognitive Symptoms of Patients with Schizophrenia: A Systematic Review.             | van den Noort, M | 2018 | No meta-analysis                                              |
| 400 | Acupuncture and Electroacupuncture for Anxiety Disorders: A Systematic Review of the Clinical Research.                                            | Amorim, D        | 2018 | No meta-analysis                                              |
| 401 | Effectiveness and Safety of Ear Acupuncture for Trauma-Related Mental Disorders after Large-Scale Disasters: A Prisma-Compliant Systematic Review. | Kwon, C Y        | 2020 | No meta-analysis                                              |
| 402 | Meta-analysis of Acupuncture and Moxibustion in the Treatment of Post-Traumatic Stress Disorder                                                    | Han Yadi         | 2017 | Acupuncture interventions did not meet the inclusion criteria |
| 403 | Acupuncture for Attention Deficit Hyperactivity Disorder: A Systematic Review                                                                      | ZHANG Shanyu     | 2020 | Acupuncture interventions did not meet the inclusion criteria |
| 404 | Acupuncture for Attention Deficit Hyperactivity Disorder: A Meta-analysis of Randomized Controlled Trials                                          | TIAN Yong        | 2019 | Acupuncture interventions did not meet the inclusion criteria |
| 405 | A Meta-analysis on Acupuncture Treatment of Attention Deficit/Hyperactivity Disorder.                                                              | Ni, X Q          | 2015 | Acupuncture interventions did not meet the inclusion criteria |

|     |                                                                                                                                            |                   |      |                                                               |
|-----|--------------------------------------------------------------------------------------------------------------------------------------------|-------------------|------|---------------------------------------------------------------|
| 406 | A Meta-analysis on Acupuncture Treatment of Attention Deficit/Hyperactivity Disorder                                                       | NI Xin-qiang      | 2015 | Acupuncture interventions did not meet the inclusion criteria |
| 407 | Neuromodulation of Autism Spectrum Disorders Using Vagal Nerve Stimulation.                                                                | van Hoorn, A      | 2019 | Acupuncture interventions did not meet the inclusion criteria |
| 408 | Acupuncture for Autism Spectrum Disorder: A Systematic Review and Meta-analysis.                                                           | Lee, B            | 2017 | Full text unavailable                                         |
| 409 | Systematic Evaluation of Acupuncture therapy for Childhood Autism                                                                          | YUAN Zhao-hong    | 2016 | Acupuncture combined with other therapies                     |
| 410 | Complementary and Alternative therapies for Autism Spectrum Disorder.                                                                      | Brondino, N       | 2015 | Acupuncture combined with other therapies                     |
| 411 | Meta-analysis of Curative Efficacy of Acupuncture for Children with Autism                                                                 | Zhang Chengximeng | 2015 | Acupuncture combined with other therapies                     |
| 412 | Scalp Acupuncture Treatment for Children's Autism Spectrum Disorders: A Systematic Review and Meta-analysis.                               | Liu, C            | 2019 | Acupuncture combined with other therapies                     |
| 413 | The Efficacy and Safety of Acupuncture for the Treatment of Children with Autism Spectrum Disorder: A Systematic Review and Meta-analysis. | Lee, Boram        | 2018 | Acupuncture combined with other therapies                     |
| 414 | A Meta-analysis on Randomized Controlled Trials of Acupuncture in Treatment of Children with Tic Disorders                                 | NI Xinqian        | 2017 | Acupuncture combined with other therapies                     |
| 415 | Management of Temporomandibular Disorders with Transcutaneous Electrical Nerve Stimulation: A Systematic Review.                           | Fertout, A        | 2019 | No meta-analysis                                              |
| 416 | Acupuncture in Temporomandibular Disorder Myofascial Pain Treatment: A System                                                              | Fernandes, A C    | 2017 | No meta-analysis                                              |

|     |                                                                                                                                           |                   |      |                                                               |
|-----|-------------------------------------------------------------------------------------------------------------------------------------------|-------------------|------|---------------------------------------------------------------|
|     | atic Review.                                                                                                                              |                   |      |                                                               |
| 417 | Meta-analysis of the Efficacy of Acupuncture Treatment of Temporomandibular Joint Disorder                                                | LI Hui-ping       | 2015 | No patient important outcome                                  |
| 418 | Salivary Hypofunction: An Update on the therapeutic Strategies.                                                                           | Salum, F G        | 2018 | No meta-analysis                                              |
| 419 | A Meta-analysis of Radiotherapy-Induced Salivary Hypofunction and Xerostomia in Patients with Head and Neck Cancer                        | SU Qun            | 2015 | Acupuncture interventions did not meet the inclusion criteria |
| 420 | Nonpharmacologic therapies in Patients with Exacerbation of Chronic Obstructive Pulmonary Disease: A Systematic Review with Meta-analysis | Dobler, C C       | 2020 | Acupuncture interventions did not meet the inclusion criteria |
| 421 | Acupuncture Techniques for Copd: a Systematic Review.                                                                                     | Fernández-Jané, C | 2020 | Acupuncture interventions did not meet the inclusion criteria |
| 422 | Acupuncture therapy for Functional Effects and Quality of Life in Copd Patients: A Systematic Review and Meta-analysis.                   | Wang, Jiajia      | 2018 | Acupuncture interventions did not meet the inclusion criteria |
| 423 | Meta-analysis of the therapeutic Effect of Acupuncture on Chronic Obstructive Pulmonary Disease                                           | CAO Ailing        | 2017 | Acupuncture combined with other therapies                     |
| 424 | Meta-analysis of Acupuncture Treatment of Bronchial Asthma Clinical Literature                                                            | LI Meng-yuan      | 2018 | Acupuncture interventions did not meet the inclusion criteria |
| 425 | Effect and Safety of Stimulating Acupoints in Children with Cough Variant Asthma: A Meta-analysis.                                        | Jin, Y            | 2018 | Acupuncture interventions did not meet the inclusion criteria |

|     |                                                                                                               |               |      |                                                               |
|-----|---------------------------------------------------------------------------------------------------------------|---------------|------|---------------------------------------------------------------|
|     |                                                                                                               |               |      | usion criteria                                                |
| 426 | Meta-analysis on Randomized Controlled Trials for Scalp Acupuncture Treatment of Stroke: A Systematic Review. | Young-Nim, Y  | 2018 | No meta-analysis                                              |
| 427 | Statistic Method Meta-analysis on Eye Acupuncture Treatment for Stroke                                        | GUAN Hongyang | 2017 | Acupuncture combined with other therapies                     |
| 428 | Acupuncture for Stroke Rehabilitation                                                                         | Yang, Ai      | 2016 | Acupuncture combined with other therapies                     |
| 429 | Eye Acupuncture Treatment for Stroke: A Systematic Review and Meta-analysis.                                  | Bai, Z H      | 2015 | Acupuncture combined with other therapies                     |
| 430 | Xingnao Kaiqiao Needling Method for Acute Ischemic Stroke: A Meta-analysis of Safety and Efficacy.            | Yang, Z X     | 2017 | Acupuncture combined with other therapies                     |
| 431 | Systematic Review of Long-Term Xingnao Kaiqiao Needling Efficacy in Ischemic Stroke Treatment.                | Yang, Z X     | 2015 | Control interventions did not meet the inclusion criteria     |
| 432 | Effectiveness of Scalp Acupuncture for Ischemic Stroke: A Meta-analysis.                                      | Wang, J H     | 2015 | Acupuncture interventions did not meet the inclusion criteria |
| 433 | Xingnao Kaiqiao Needling Method for Acute Ischemic Stroke: A Meta-analysis of Safety and Efficacy.            | Yang, Z X     | 2017 | Acupuncture combined with other therapies                     |
| 434 | Electroacupuncture for Acute Ischemic Stroke.                                                                 | Liu, A J      | 2015 | Acupuncture combined with other therapies                     |
| 435 | Meta-analysis of Floating-Needle therapy for Post-Stroke Shoulder-Hand Syndrome                               | WANG Zhenhui  | 2018 | Control interventions did not meet the inclusion              |

|     |                                                                                                                                                          |                |      |                                                               |
|-----|----------------------------------------------------------------------------------------------------------------------------------------------------------|----------------|------|---------------------------------------------------------------|
|     |                                                                                                                                                          |                |      | n criteria                                                    |
| 436 | Systematic Evaluation and Meta-analysis of Acupuncture Antagonistic Muscle therapy for Spastic Paralysis after Stroke                                    | WANG Rui       | 2019 | Control interventions did not meet the inclusion criteria     |
| 437 | Systematic Review and Meta-analysis on the therapeutic Effect of Acupuncture on Hypertonia of Hand Muscle in Patients with Stroke                        | Zhang Zengqiao | 2019 | Acupuncture combined with other therapies                     |
| 438 | Meta-analysis on Acupuncture for Hand Spasm Post-Stroke                                                                                                  | Qi Conghui     | 2019 | Acupuncture combined with other therapies                     |
| 439 | Effect of Transcutaneous Electrical Nerve Stimulation (Tens) on Spasticity in Adults with Stroke: A Systematic Review and Meta-analysis.                 | Mahmood, A     | 2019 | Acupuncture combined with other therapies                     |
| 440 | Systematic Review and Meta-analysis of Acupuncture Treatment for Post-Stroke Hand Dysfunction                                                            | QI Cong-hui    | 2018 | Acupuncture combined with other therapies                     |
| 441 | Transcutaneous Electrical Nerve Stimulation Improves Walking Capacity and Reduces Spasticity in Stroke Survivors: a Systematic Review and Meta-analysis. | Kwong, P W     | 2018 | Acupuncture combined with other therapies                     |
| 442 | Meta-analysis on the therapeutic Effect of Acupuncture At Meridian Sinew for Spastic Paralysis after Stroke.                                             | Zhang, Y       | 2017 | Control interventions did not meet the inclusion criteria     |
| 443 | Meta-analysis on the Effect of Acupuncture and Moxibustion on Limb Motor Dysfunction in Patients with Stroke                                             | Zheng Yi       | 2016 | Acupuncture interventions did not meet the inclusion criteria |
| 444 | Systematic Evaluation of Acupuncture for the Treatment of Post-Stroke Strophodonia                                                                       | ZHANG Yong     | 2016 | Acupuncture combined with other therapies                     |
| 445 | Acupuncture for Spasticity after Stroke: a Systematic Review and Meta-analysis of Randomized Controlled Trials                                           | Lim, S M       | 2015 | Control interventions did not meet                            |

|     |                                                                                                                                             |                 |      |                                                               |
|-----|---------------------------------------------------------------------------------------------------------------------------------------------|-----------------|------|---------------------------------------------------------------|
|     |                                                                                                                                             |                 |      | the inclusion criteria                                        |
| 446 | Meta-analysis and Test Sequential Analysis of Depressive State in Patients with Post-Stroke Depression Treated with Acupuncture             | Xu Ruoxi        | 2019 | Acupuncture combined with other therapies                     |
| 447 | Systematic Review and Meta-analysis of the Clinical Efficacy of Eye Acupuncture in the Treatment of Poststroke Depression                   | YANG wei        | 2019 | Control interventions did not meet the inclusion criteria     |
| 448 | The Effectiveness of Acupuncture therapy in Patients with Post-Stroke Depression: An Updated Meta-analysis of Randomized Controlled Trials. | Zhang, X<br>Y   | 2019 | Acupuncture interventions did not meet the inclusion criteria |
| 449 | A Meta-analysis of the Efficacy of Acupuncture and Electro-acupuncture on Post-Stroke Depression                                            | HUANG Yijie     | 2018 | Acupuncture combined with other therapies                     |
| 450 | Meta-analysis of Effect of Acupuncture and Antidepressants on Depression in Patients with Post-Stroke Depression                            | ZHOU Xin        | 2018 | Acupuncture interventions did not meet the inclusion criteria |
| 451 | Jin Three-Needle therapy for Post-Stroke Depression: A Systematic Review and Meta-analysis                                                  | WEI Yanyi<br>ng | 2018 | Acupuncture interventions did not meet the inclusion criteria |
| 452 | Meta-analysis of Auricular Point Sticking in the Treatment of Post-Stroke Depression                                                        | WANG Qiang      | 2018 | Acupuncture interventions did not meet the inclusion criteria |
| 453 | Scalp Acupuncture therapy for Post-Stroke Depression: A Systematic Review                                                                   | ZHANG Huajun    | 2017 | Acupuncture interventions did not meet the inclusion criteria |

|     |                                                                                                                                 |              |      |                                                           |
|-----|---------------------------------------------------------------------------------------------------------------------------------|--------------|------|-----------------------------------------------------------|
|     |                                                                                                                                 |              |      | a                                                         |
| 454 | An Meta-analysis of Acupuncture for Post-Stroke Depression                                                                      | YIN Miaomiao | 2016 | No patient important outcome                              |
| 455 | Consciousness Restoring for Resuscitation Acupuncture therapy for Dysphagia after Stroke: A Systematic Review and Meta-analysis | XU Lianjie   | 2019 | Control interventions did not meet the inclusion criteria |
| 456 | Meta-analysis of therapeutic Effect of Tongue Tri-Points therapy on Post Stroke Pseudobulbar Palsy                              | Yang Jiwei   | 2018 | Control interventions did not meet the inclusion criteria |
| 457 | Acupuncture Treatment for Post-Stroke Dysphagia: An Update Meta-analysis of Randomized Controlled Trials.                       | Li, L X      | 2018 | Acupuncture combined with other therapies                 |
| 458 | The Efficacy of Acupuncture for Post-Stroke Dysphagia: A Systematic Review and Meta-analysis                                    | WANG Chun    | 2017 | Acupuncture combined with other therapies                 |
| 459 | Meta-analysis of Curative Effects of Acupuncture therapy on Dysphagia after Stroke                                              | XU Minghua   | 2017 | Control interventions did not meet the inclusion criteria |
| 460 | Meta-analysis of Randomized Controlled Trials on Electro-acupuncture in the Treatment of Dysphagia after Stroke                 | ZHANG Yi     | 2017 | Acupuncture combined with other therapies                 |
| 461 | Systematic Review on Acupuncture for Treatment of Dysphagia after Stroke.                                                       | Ye, Qiuping  | 2017 | Acupuncture combined with other therapies                 |
| 462 | Clinical Literature Study of Acupuncture and Moxibustion in the Treatment of Post-Stroke Dysphagia Based on Meta-analysis       | MENG Dan     | 2016 | Acupuncture combined with other therapies                 |
| 463 | A Meta-analysis of the therapeutic Effect of Nape Acupuncture on Post-Stroke Dysphagia in Domestic Literature                   | HU Tian-jun  | 2015 | Acupuncture combined with other therapies                 |
| 464 | Mesh Meta-analysis of Different Acupuncture                                                                                     | ZHU Jing     | 2019 | Control inte                                              |



|     |                                                                                                                       |             |      |                                                               |
|-----|-----------------------------------------------------------------------------------------------------------------------|-------------|------|---------------------------------------------------------------|
|     | ure therapy for Shoulder Pain after Stroke                                                                            |             |      | interventions did not meet the inclusion criteria             |
| 465 | Clinical Effects of Different Acupuncture therapy in Treatment of Post-Stroke Shoulder Pain                           | LIU Fushui  | 2019 | Control interventions did not meet the inclusion criteria     |
| 466 | Systematic Reviews of Clinical Effect of Floating Needle in the Treatment of Shoulder Pain after Stroke               | WEI Zemin   | 2019 | Acupuncture combined with other therapies                     |
| 467 | Effects of Acupuncture on the Recovery Outcomes of Stroke Survivors with Shoulder Pain: A Systematic Review.          | Chau, J P C | 2018 | Acupuncture combined with other therapies                     |
| 468 | Acupuncture for Poststroke Shoulder Pain: A Systematic Review and Meta-analysis.                                      | Lee, S H    | 2016 | Acupuncture combined with other therapies                     |
| 469 | Acupuncture for the Treatment of Hiccups Following Stroke: a Systematic Review and Meta-analysis.                     | Yue, J      | 2017 | No patient important outcome                                  |
| 470 | Acupuncture for Insomnia after Stroke: a Systematic Review and Meta-analysis.                                         | Lee, S H    | 2016 | Acupuncture interventions did not meet the inclusion criteria |
| 471 | Meta-analysis of Randomized Controlled Clinical Studies on Acupuncture and Moxibustion for Limb Numbness after Stroke | Chen Lizao  | 2020 | Acupuncture interventions did not meet the inclusion criteria |
| 472 | Systematic Evaluation of Acupuncture for Treatment of Urinary Retention after Cerebral Apoplexy                       | Wang Huimin | 2019 | Acupuncture interventions did not meet the inclusion criteria |
| 473 | Meta-analysis on Evaluation Index of Acupuncture Improving Self-Care Ability of                                       | Wang Xing   | 2018 | Acupuncture intervention                                      |

|     |                                                                                                                                      |              |      |                                                               |
|-----|--------------------------------------------------------------------------------------------------------------------------------------|--------------|------|---------------------------------------------------------------|
|     | Post-Stroke Patients                                                                                                                 |              |      | s did not meet the inclusion criteria                         |
| 474 | Therapeutic Efficacy of Acupuncture At Baihui (Gv 20) and Shenting (Gv 24) for Post-Stroke Cognitive Impairment: A Systematic Review | LIU Fang     | 2018 | Acupuncture combined with other therapies                     |
| 475 | Electroacupuncture for Post Stroke Cognitive Impairment: a Systematic Review and Meta-analyses                                       | ZHAN Jie     | 2017 | Acupuncture combined with other therapies                     |
| 476 | Meta-analysis of Scalp Acupuncture on Cognitive Disorder after Stroke                                                                | CHEN Li-zao  | 2016 | Acupuncture interventions did not meet the inclusion criteria |
| 477 | Scalp Acupuncture for the Treatment of Cognitive Dysfunction after Stroke: A Systematic Review                                       | Xiong Jian   | 2016 | Acupuncture combined with other therapies                     |
| 478 | Rects Meta-analysis of Electro-acupuncture Treating Post-Stroke Constipation                                                         | WANG De-long | 2018 | No detailed information on intervention or outcome            |
| 479 | Systematic Review on Acute Cerebral Infarction Treated with Acupuncture At the Points of the Governor Vessel                         | JI Jian-gang | 2018 | No detailed information on intervention or outcome            |
| 480 | A Meta-analysis on Effectiveness of Electro- Acupuncture on Post-Stroke Urinary Incontinence                                         | TAN Zhi-gao  | 2015 | No patient important outcome                                  |
| 481 | Effectiveness of Non-Pharmacological Interventions on the Management of Sarcopenic Obesity: A Systematic Review and Meta-analysis.   | Yin, Y H     | 2020 | Acupuncture combined with other therapies                     |
| 482 | Effectiveness of Electroacupuncture for Simple Obesity: A Systematic Review and Meta-analysis of Randomized Controlled Trials.       | Gao, Yanling | 2020 | Control interventions did not meet the inclusion criteria     |

|     |                                                                                                                                                                |                 |      |                                                               |
|-----|----------------------------------------------------------------------------------------------------------------------------------------------------------------|-----------------|------|---------------------------------------------------------------|
| 483 | Effect of Acupuncture and Intervention Types on Weight Loss: a Systematic Review and Meta-analysis.                                                            | Kim, S Y        | 2018 | Acupuncture interventions did not meet the inclusion criteria |
| 484 | Auricular Acupressure for Overweight and Obese Individuals: A Systematic Review and Meta-analysis.                                                             | Huang, C F      | 2019 | Acupuncture combined with other therapies                     |
| 485 | Acupuncture and Related therapies for Obesity: A Network Meta-analysis.                                                                                        | Zhang, Y        | 2018 | Acupuncture interventions did not meet the inclusion criteria |
| 486 | A Systematic Review and Meta-analysis of Randomized Clinical Trials About Acupuncture Treatment for Obesity-Related Hormone and Blood Lipids of Female Obesity | ZHANG Rongqiang | 2017 | No patient important outcome                                  |
| 487 | Does Laser Acupuncture An Effective Complementary therapy for Obesity Management? A Systematic Review of Clinical Trials.                                      | Namazi, N       | 2017 | No meta-analysis                                              |
| 488 | Acupuncture for the Treatment of Obesity in Adults: a Systematic Review and Meta-analysis.                                                                     | Zhang, R Q      | 2017 | No detailed information on intervention or outcome            |
| 489 | The Efficacy and Safety of Acupuncture on Serum Leptin Levels in Obese Patients: A Systematic Review and Meta-analysis.                                        | Park, K S       | 2017 | No patient important outcome                                  |
| 490 | Acupuncture and Lifestyle Modification Treatment for Obesity: A Meta-analysis.                                                                                 | Fang, S         | 2017 | Acupuncture combined with other therapies                     |
| 491 | The Effect of Auricular Acupoint Stimulation in Overweight and Obese Adults: A Systematic Review and Meta-analysis of Randomized Controlled Trials.            | Yeh, Tzu-Lin    | 2017 | Acupuncture combined with other therapies                     |
| 492 | Acupuncture for Obesity: a Systematic Review                                                                                                                   | Kim, Jiin       | 2016 | Acupuncture combined                                          |

|     |                                                                           |           |      |                                           |
|-----|---------------------------------------------------------------------------|-----------|------|-------------------------------------------|
|     |                                                                           |           |      | with other therapies                      |
| 493 | Auricular Acupuncture for Obesity: A Systematic Review and Meta-analysis. | Ruan, Z   | 2016 | Full text unavailable                     |
| 494 | A Meta-analysis on Effectiveness of Acupuncture on Post-Stroke Insomnia   | NIE Fefen | 2020 | Acupuncture combined with other therapies |
