# Supplementary material
Source: HighWire-hosted journal article supplement (https://bmjopen.bmj.com/content/12/6/e056803)
Supplement: inline-supplementary-material-3 [file inline-supplementary-material-3.pdf]

Table 1 Characteristics of systematic reviews

| ID | First author<br>Year | Country | Therapeutic<br>area    | Disease or<br>condition                           | No.<br>of<br>RCTs | No. of<br>participants | Patient important<br>outcomes                                             | Interventions vs Controls                                                   | Quality<br>assessment<br>tool for<br>original<br>studies<br>included in<br>SR |
|----|----------------------|---------|------------------------|---------------------------------------------------|-------------------|------------------------|---------------------------------------------------------------------------|-----------------------------------------------------------------------------|-------------------------------------------------------------------------------|
| 1  | Juan Zhu<br>2019     | China   | Periprocedural<br>care | Postoperative pain                                | 35                | 1819                   | 1.Postoperative resting<br>pain intensity at 24h (VAS)                    | 1.electro-acupuncture/<br>ear(auricular) acupuncture vs sham<br>acupuncture | Cochrane<br>risk of bias<br>tool                                              |
|    |                      |         |                        |                                                   |                   |                        | 2.Intensity of postoperative<br>pain on movement or<br>cough at 24h (VAS) | 2. electro -acupuncture/ TENS vs<br>sham acupuncture                        |                                                                               |
| 2  | Kai-Bo Che<br>2019   | China   | Periprocedural<br>care | Postoperative ileus<br>after abdominal<br>surgery | 15                | 965                    | 1.Time to first flatus                                                    | 1. electro-acupuncture vs standard<br>of care                               | Cochrane<br>risk of bias<br>tool                                              |
|    |                      |         |                        |                                                   |                   |                        | 2.Time to first defecation                                                | 2. electro-acupuncture vs standard<br>of care                               |                                                                               |
|    |                      |         |                        |                                                   |                   |                        | 3.Time to bowel sound<br>recovery                                         | 3. electro-acupuncture vs standard<br>of care                               |                                                                               |
|    |                      |         |                        |                                                   |                   |                        | 4.Time to first oral feeding                                              | 4.electro-acupuncture vs standard<br>of care                                |                                                                               |
|    |                      |         |                        |                                                   |                   |                        | 5.Length of hospital stay                                                 | 5. electro-acupuncture vs standard<br>of care                               |                                                                               |
| 3  | Lu Jing 2018         | China   | Periprocedural<br>care | Hot flashes after<br>breast can                   | 9                 | 646                    | 1.Hot flashes after breast<br>cancer surgery                              | 1.body needling vs sham<br>acupuncture                                      | Cochrane<br>risk of bias                                                      |

|   |                  |       |                     |                                            |    |     |                                                                         |                                                          |                                          |
|---|------------------|-------|---------------------|--------------------------------------------|----|-----|-------------------------------------------------------------------------|----------------------------------------------------------|------------------------------------------|
|   |                  |       |                     |                                            |    |     | 2. Hot flashes after breast cancer surgery                              | 2.electro-acupuncture vs western medicine                | tool                                     |
|   |                  |       |                     |                                            |    |     | 3.Hot flashes after breast cancer surgery                               | 3.body needling/ electro-acupuncture vs no intervention  |                                          |
|   |                  |       |                     |                                            |    |     | 4. Hot flashes after breast cancer surgery (follow-up for 3 months)     | 4.body needling/ electro-acupuncture vs no intervention  |                                          |
|   |                  |       |                     |                                            |    |     | 5. Hot flashes after breast cancer surgery (follow-up for 3 months)     | 5.body needling/ electro-acupuncture vs sham acupuncture |                                          |
| 4 | Yongjun ZHU 2017 | China | Periprocedural care | Pain control after total knee arthroplasty | 6  | 529 | 1.Pain intensity (VAS) over a period of 24h                             | 1.TENS vs sham acupuncture                               | Jadad score                              |
| 5 | T.-J. Chien 2020 | China | Oncology            | Breast cancer-related menopause symptoms   | 13 | 943 | 1. Frequency of hot flushes in breast cancer (3 months after treatment) | 1.body needling vs sham acupuncture                      | Cochrane risk of bias tool + Jadad score |
|   |                  |       |                     |                                            |    |     | 2. Severity of hot flushes in breast cancer (3 months after treatment)  | 2.body needling vs standard of care                      |                                          |
|   |                  |       |                     |                                            |    |     | 3.Menopause symptoms in breast cancer (3 months after treatment)        | 3.body needling vs sham acupuncture                      |                                          |
|   |                  |       |                     |                                            |    |     | 4.Menopause symptoms in breast cancer (3 months after treatment)        | 4. body needling vs standard of care                     |                                          |

|   |                       |       |          |                                                                  |    |      |                                                                                              |                                                   |                                  |
|---|-----------------------|-------|----------|------------------------------------------------------------------|----|------|----------------------------------------------------------------------------------------------|---------------------------------------------------|----------------------------------|
| 6 | Yihan He<br>2019      | China | Oncology | Cancer pain                                                      | 17 | 1111 | 1.Cancer Pain Intensity                                                                      | 1.acupuncture vs sham<br>acupuncture              | Cochrane<br>risk of bias<br>tool |
|   |                       |       |          |                                                                  |    |      | 2.Cancer Pain Intensity                                                                      | 2.acupuncture vs waiting list                     |                                  |
| 7 | Lawrence<br>Chen 2017 | China | Oncology | Aromatase<br>inhibitor-induced<br>arthralgia in breast<br>cancer | 5  | 181  | 1.The severity of post<br>treatment pain (worst pain<br>at 3-4weeks)                         | 1.acupuncture vs sham<br>acupuncture              | Cochrane<br>risk of bias<br>tool |
|   |                       |       |          |                                                                  |    |      | 2.The severity of post<br>treatment pain (pain<br>severity at 3-4weeks)                      | 2.acupuncture vs sham<br>acupuncture              |                                  |
|   |                       |       |          |                                                                  |    |      | 3.The severity of post<br>treatment pain<br>(pain-related interference<br>scores at 3-4week) | 3.acupuncture vs sham<br>acupuncture              |                                  |
|   |                       |       |          |                                                                  |    |      | 4.Stiffness at 3-4 weeks                                                                     | 4.acupuncture vs sham<br>acupuncture              |                                  |
|   |                       |       |          |                                                                  |    |      | 5.Function at 3-4 weeks                                                                      | 5.acupuncture vs sham<br>acupuncture              |                                  |
| 8 | Pei Lixia<br>2019     | China | Oncology | The quality of life of<br>breast cancer<br>patients              | 7  | 453  | 1.Quality of life                                                                            | 1.acupuncture vs western medicine                 | Cochrane<br>risk of bias<br>tool |
|   |                       |       |          |                                                                  |    |      | 2.Quality of life                                                                            | 2.auricular point sticking vs sham<br>acupuncture |                                  |
|   |                       |       |          |                                                                  |    |      | 3.Quality of life                                                                            | 3.auricular point sticking vs<br>standard of care |                                  |
| 9 | Wei-Wei<br>Tao 2016   | China | Oncology | Symptom<br>management of<br>cancer                               | 68 | 5530 | 1.Fatigue (BFI)                                                                              | 1.acupuncture vs sham<br>acupuncture              | Cochrane<br>risk of bias<br>tool |
|   |                       |       |          |                                                                  |    |      | 2. Fatigue (BPI)                                                                             | 2.acupuncture vs standard of care                 |                                  |

|    |                  |       |           |                                    |    |      |                                                              |                                                          |                            |
|----|------------------|-------|-----------|------------------------------------|----|------|--------------------------------------------------------------|----------------------------------------------------------|----------------------------|
|    |                  |       |           |                                    |    |      | 3.Remission rate of diarrhea                                 | 3.acupuncture vs standard of care                        |                            |
|    |                  |       |           |                                    |    |      | 4.Hiccups                                                    | 4.acupuncture vs standard of care                        |                            |
|    |                  |       |           |                                    |    |      | 5.Nausea and vomit                                           | 5.acupuncture vs standard of care                        |                            |
| 10 | Mangmang Xu 2018 | China | Neurology | Acute stroke                       | 33 | 3946 | 1.Death or dependency at end of follow-up                    | 1.acupuncture vs sham acupuncture                        | Cochrane risk of bias tool |
|    |                  |       |           |                                    |    |      | 2.Death or dependency at end of follow-up                    | 2.acupuncture vs no intervention                         |                            |
|    |                  |       |           |                                    |    |      | 3.Death or dependency at end of follow-up ( $\geq 3$ months) | 3.acupuncture vs sham acupuncture                        |                            |
|    |                  |       |           |                                    |    |      | 4.Death or dependency at end of follow-up ( $\geq 3$ months) | 4.acupuncture vs no intervention                         |                            |
| 11 | Shaonan Liu 2019 | China | Neurology | Post-stroke shoulder-hand syndrome | 40 | 3264 | 1.Motor function (upper limb FMA)                            | 1.electro-acupuncture + rehabilitation vs rehabilitation | Cochrane risk of bias tool |
|    |                  |       |           |                                    |    |      | 2.Motor function (upper limb FMA)                            | 2.manual acupuncture + rehabilitation vs rehabilitation  |                            |
|    |                  |       |           |                                    |    |      | 3.Pain improvement (VAS)                                     | 3.electro-acupuncture + rehabilitation vs rehabilitation |                            |
|    |                  |       |           |                                    |    |      | 4.Pain improvement (VAS)                                     | 4.manual acupuncture + rehabilitation vs rehabilitation  |                            |
|    |                  |       |           |                                    |    |      | 5.Activities of daily living (MBI)                           | 5.manual acupuncture + rehabilitation vs rehabilitation  |                            |
|    |                  |       |           |                                    |    |      | 6.Improvement in shoulder abduction (ROM)                    | 6.manual acupuncture + rehabilitation vs rehabilitation  |                            |

|    |                    |       |           |                                  |    |      |                                                  |                                                                                      |                            |
|----|--------------------|-------|-----------|----------------------------------|----|------|--------------------------------------------------|--------------------------------------------------------------------------------------|----------------------------|
| 12 | Wenjuan Fan 2020   | China | Neurology | Post-stroke spastic hemiplegia   | 36 | 2628 | 1.Motor function (FMA)                           | 1.manual acupuncture vs rehabilitation                                               | Cochrane risk of bias tool |
|    |                    |       |           |                                  |    |      | 2.Motor function (FMA)                           | 2.electro-acupuncture vs rehabilitation                                              |                            |
|    |                    |       |           |                                  |    |      | 3.Spasticity Assessment (ASS)                    | 3.manual acupuncture/ electro-acupuncture + rehabilitation vs rehabilitation         |                            |
|    |                    |       |           |                                  |    |      | 4.Quality of daily life (BI)                     | 4.manual acupuncture/electro acupuncture+ rehabilitation vs rehabilitation           |                            |
| 13 | Binlong Zhang 2019 | China | Neurology | Post-stroke aphasia              | 28 | 1747 | 1.Functional communication                       | 1.acupuncture/scalp acupuncture + language rehabilitation vs language rehabilitation | Cochrane risk of bias tool |
| 14 | Xue-bin Li 2018    | China | Neurology | Post-stroke depression           | 18 | 1536 | 1.Depression(HAMD) (at week 4 after treatment)   | 1.electro-acupuncture vs western medicine                                            | Cochrane risk of bias tool |
| 15 | Xiaolan Lin 2016   | China | Neurology | Post-stroke cognitive impairment | 19 | 1275 | 1.Cognitive function (MMSE)                      | 1.manual acupuncture/electro acupuncture /scalp acupuncture vs standard of care      | NA                         |
|    |                    |       |           |                                  |    |      | 2.Cognitive function (ADL)                       | 2.manual acupuncture/scalp acupuncture vs standard of care                           |                            |
|    |                    |       |           |                                  |    |      | 3.Cognitive function (MoCA)                      | 3.manual acupuncture/electro-acupuncture vs standard of care                         |                            |
| 16 | Lin Guohua 2016    | China | Neurology | Neurological function deficit    | 6  | 572  | 1.Neurological impairment (NDS) (at week 4 after | 1.body needling vs rehabilitation                                                    | Cochrane risk of bias      |

|    |                      |           |           | of non-acute stage stroke              |    |      | treatment)                                                    |                                                                             | tool + Jadad score                       |
|----|----------------------|-----------|-----------|----------------------------------------|----|------|---------------------------------------------------------------|-----------------------------------------------------------------------------|------------------------------------------|
| 17 | Tong Li 2019         | China     | Neurology | Vascular dementia                      | 17 | 1283 | 1.Cognitive function (HDS) (within 28 to 90 days)             | 1. body needling/ electro-acupuncture/scalp acupuncture vs western medicine | Cochrane risk of bias tool               |
| 18 | Sang-Ho Kim 2019     | Korean    | Neurology | Insomnia disorder                      | 22 | 1761 | 1.Sleep quality (PSQI) (within 14 to 74 days after treatment) | 1.manual acupuncture vs western medicine                                    | Cochrane risk of bias tool               |
| 19 | Alexander Waits 2016 | China     | Neurology | Insomnia disorder                      | 13 | 968  | 1.Sleep quality (PSQI) (within 3 to 4 weeks)                  | 1.acupressure vs sham acupressure                                           | Cochrane risk of bias tool + Jadad score |
| 20 | Xintian Wang 2020    | China     | Neurology | Sleep quality in hemodialysis patients | 7  | 522  | 1.Sleep quality (PSQI) (within 4 to 12 weeks after treatment) | 1.acupressure vs sham acupuncture                                           | Jadad score                              |
| 21 | Guangcai Zhang 2016  | China     | Neurology | Perimenopausal sleep disorder          | 8  | 539  | 1.Sleep quality (PSQI)                                        | 1.manual acupuncture vs western medicine                                    | Cochrane risk of bias tool               |
|    |                      |           |           |                                        |    |      | 2.Sleep Quality (PSQI)                                        | 2.manual acupuncture vs sham acupuncture                                    |                                          |
| 22 | Cuihua Yang 2018     | China     | Neurology | Senile insomnia                        | 7  | 539  | 1.Sleep quality (PSQI)                                        | 1.manual acupuncture vs western medicine                                    | Jadad score                              |
| 23 | YingYing Zang 2019   | China     | Neurology | Depression-related sleep disorders     | 15 | 1081 | 1.Sleep quality (PSQI)                                        | 1.acupuncture vs western medicine                                           | Cochrane risk of bias tool               |
| 24 | William Gibson 2017  | Australia | Neurology | Neurogenic pain                        | 15 | 724  | 1.Pain intensity (VAS)                                        | 1.TENS vs sham acupuncture                                                  | Cochrane risk of bias                    |

|    |                    |        |           |                                              |    |      |                                                            |                                                                           |                            |
|----|--------------------|--------|-----------|----------------------------------------------|----|------|------------------------------------------------------------|---------------------------------------------------------------------------|----------------------------|
|    |                    |        |           |                                              |    |      |                                                            |                                                                           | tool                       |
| 25 | Hyeonseok Noh 2017 | Korean | Neurology | Parkinson's disease (PD)                     | 42 | 2625 | 1.Assessment of PD symptoms (UPDRS)                        | 1.acupuncture vs sham acupuncture                                         | Cochrane risk of bias tool |
| 26 | Boram Lee 2018     | Korean | Neurology | Children with autism spectrum disorder (ASD) | 27 | 1736 | 1.Evaluation the core features of ASD (Overall CARS score) | 1.acupuncture vs behavioral and educational interventions                 | Cochrane risk of bias tool |
|    |                    |        |           |                                              |    |      | 2.Evaluation the core features of ASD (Overall CARS score) | 2.acupuncture vs behavioral and educational interventions + music therapy |                            |
| 27 | Mingxiao Yang 2020 | China  | Neurology | Menstrual migraine                           | 13 | 826  | 1.Migraine days per month                                  | 1. manual acupuncture vs sham acupuncture                                 | Cochrane risk of bias tool |
|    |                    |        |           |                                              |    |      | 2.Migraine days per month (at month 3 after treatment)     | 2. manual acupuncture vs sham acupuncture                                 |                            |
|    |                    |        |           |                                              |    |      | 3.Mean headache intensity (VAS)                            | 3. manual acupuncture/electro-acupuncture vs western medicine             |                            |
| 28 | Jia Xu 2018        | China  | Neurology | Migraine without aura                        | 15 | 1361 | 1.Frequency of migraine                                    | 1.acupuncture/manual acupuncture vs sham acupuncture                      | Cochrane risk of bias tool |
|    |                    |        |           |                                              |    |      | 2.Frequency of migraine                                    | 2.acupuncture/manual acupuncture vs western medicine                      |                            |
|    |                    |        |           |                                              |    |      | 3.Pain intensity (VAS)                                     | 3. ear acupuncture/acupuncture vs sham acupuncture                        |                            |
|    |                    |        |           |                                              |    |      | 4.Pain intensity (VAS)                                     | 4.ear acupuncture/acupuncture vs western medicine                         |                            |

|    |                     |         |           |                             |    |      |                                                                                                         |                                      |                                  |
|----|---------------------|---------|-----------|-----------------------------|----|------|---------------------------------------------------------------------------------------------------------|--------------------------------------|----------------------------------|
| 29 | Yin Jiang<br>2018   | China   | Neurology | Migraine quality of<br>life | 62 | 4947 | 1.Migraine quality of life<br>(MSQ) ( $\leq$ 1 month after<br>treatment, role<br>function-restrictive)  | 1.acupuncture vs sham<br>acupuncture | Cochrane<br>risk of bias<br>tool |
|    |                     |         |           |                             |    |      | 2.Migraine quality of life<br>(MSQ) ( $\geq$ 6 months after<br>treatment, role<br>function-restrictive) | 2.acupuncture vs sham<br>acupuncture |                                  |
|    |                     |         |           |                             |    |      | 3.Migraine quality of life<br>(MSQ) ( $\leq$ 1month after<br>treatment, role<br>function-preventive)    | 3.acupuncture vs sham<br>acupuncture |                                  |
|    |                     |         |           |                             |    |      | 4.Migraine quality of life<br>(MSQ) ( $\geq$ 6 months after<br>treatment, role<br>function-preventive)  | 4.acupuncture vs sham<br>acupuncture |                                  |
|    |                     |         |           |                             |    |      | 5.Migraine quality of life<br>(MSQ) ( $\leq$ 1month after<br>treatment, emotional<br>function)          | 5.acupuncture vs sham<br>acupuncture |                                  |
|    |                     |         |           |                             |    |      | 6.Migraine quality of life<br>(MSQ) ( $\geq$ 6 months after<br>treatment, emotional<br>function)        | 6.acupuncture vs sham<br>acupuncture |                                  |
| 30 | Klaus Linde<br>2016 | Germany | Neurology | Tension headache            | 12 | 2349 | 1.Response after treatment<br>(at least 50% reduction in                                                | 1.acupuncture vs sham<br>acupuncture | Cochrane<br>risk of bias         |



|                                                                                                                             |                                      |        |           |                                    |    |      |                                                                      |                                                                |                                  |
|-----------------------------------------------------------------------------------------------------------------------------|--------------------------------------|--------|-----------|------------------------------------|----|------|----------------------------------------------------------------------|----------------------------------------------------------------|----------------------------------|
|                                                                                                                             |                                      |        |           |                                    |    |      | headache frequency)<br>(within 3 to 4 months after<br>randomization) |                                                                | tool                             |
| 31                                                                                                                          | Hwan Kim<br>2019                     | Korean | Neurology | Mild cognitive<br>impairment (MCI) | 5  | 257  | 1.Cognitive function<br>(MMSE)                                       | 1.electro-acupuncture vs western<br>medicine                   | Cochrane<br>risk of bias<br>tool |
|                                                                                                                             |                                      |        |           |                                    |    |      | 2.Cognitive function<br>(MoCA)                                       | 2.electro-acupuncture vs western<br>medicine                   |                                  |
| 32                                                                                                                          | Gwang-Ho<br>Choi<br>2019             | Korean | Neurology | Carpal tunnel<br>syndrome (CTS)    | 12 | 869  | 1.Pain (VAS)                                                         | 1.laser acupuncture vs sham<br>acupuncture                     | Cochrane<br>risk of bias<br>tool |
|                                                                                                                             |                                      |        |           |                                    |    |      | 2.Pain (VAS) (at week 4<br>after randomization)                      | 2.manual acupuncture vs western<br>medicine                    |                                  |
|                                                                                                                             |                                      |        |           |                                    |    |      | 3.Pain (VAS) (at week 5<br>after randomization)                      | 3. acupuncture vs standard of care                             |                                  |
|                                                                                                                             |                                      |        |           |                                    |    |      | 4.Key pinch-pinch strength<br>(at a 3-month follow-up)               | 4.acupuncture vs sham<br>acupuncture                           |                                  |
|                                                                                                                             |                                      |        |           |                                    |    |      | 5.Tip pinch-pinch strength<br>(at a 3-month follow-up)               | 5.acupuncture vs sham<br>acupuncture                           |                                  |
| 6.Improvement in<br>functional status and/or<br>health-related quality of<br>life parameter (at month 3<br>after treatment) | 6.acupuncture vs sham<br>acupuncture |        |           |                                    |    |      |                                                                      |                                                                |                                  |
| 33                                                                                                                          | Xinqiang Ni<br>2017                  | China  | Neurology | Tic disorder                       | 29 | 2325 | 1.Severity of tics (YGTSS)                                           | 1.electro-acupuncture/scalp<br>acupuncture vs western medicine | Jadad score                      |
| 34                                                                                                                          | Ping Wu<br>2017                      | China  | Neurology | Prosopalgia                        | 8  | 477  | 1.Recurrence rate                                                    | 1.electro-acupuncture vs western<br>medicine                   | Cochrane<br>risk of bias         |

|    |                                 |       |                            |                     |    |      |                                                                              |                                          |                                          |
|----|---------------------------------|-------|----------------------------|---------------------|----|------|------------------------------------------------------------------------------|------------------------------------------|------------------------------------------|
|    |                                 |       |                            |                     |    |      |                                                                              |                                          | tool                                     |
| 35 | Zhuanzhuan Hou<br>2017          | China | Neurology                  | Cervical vertigo    | 10 | 914  | 1.Improvement rate of clinical symptoms-headache (at day 20 after treatment) | 1.acupuncture vs western medicine        | Cochrane risk of bias tool               |
|    |                                 |       |                            |                     |    |      | 2.Improvement rate of clinical symptoms-vertigo (at day 20 after treatment)  | 2.acupuncture vs western medicine        |                                          |
| 36 | Eric Manheime, Ke Cheng<br>2018 | USA   | Connective tissue diseases | Hip osteoarthritis  | 6  | 413  | 1.Pain (WOMAC/VAS) (short-term-2 weeks after the end of treatment)           | 1.manual acupuncture vs sham acupuncture | Cochrane risk of bias tool               |
|    |                                 |       |                            |                     |    |      | 2.Pain (VAS)                                                                 | 2.eletro-acupuncture vs western medicine |                                          |
|    |                                 |       |                            |                     |    |      | 3.Function                                                                   | 3.manual acupuncture vs sham acupuncture |                                          |
|    |                                 |       |                            |                     |    |      | 4.Function (Harris function score)                                           | 4.eletro-acupuncture vs western medicine |                                          |
|    |                                 |       |                            |                     |    |      | 5.Quality of life                                                            | 5.manual acupuncture vs sham acupuncture |                                          |
| 37 | Chen Rilan<br>2020              | China | Connective tissue diseases | Knee osteoarthritis | 11 | 727  | 1.Severity of knee (ISOA)                                                    | 1.eletro-acupuncture vs western medicine | Cochrane risk of bias tool + Jadad score |
| 38 | Qinhong Zhang                   | China | Connective tissue diseases | Chronic knee pain   | 19 | 2149 | 1.Pain (WOMAC)                                                               | 1. body needling vs no intervention      | Cochrane risk of bias                    |

|    |                      |        |                            |                       |    |      |                                                                                      |                                                                                            |                            |                                   |
|----|----------------------|--------|----------------------------|-----------------------|----|------|--------------------------------------------------------------------------------------|--------------------------------------------------------------------------------------------|----------------------------|-----------------------------------|
|    | 2017                 |        |                            |                       |    |      | 2.Pain (WOMAC)                                                                       | 2. body needling vs standard care                                                          | tool                       |                                   |
|    |                      |        |                            |                       |    |      | 3.Pain (WOMAC)                                                                       | 3.electro-acupuncture vs western medicine                                                  |                            |                                   |
| 39 | Qi-ling Yuan<br>2016 | China  | Connective tissue diseases | Musculoskeletal pain  | 6  | 6382 | 1.Neck pain after the end of an intervention period ( $\leq$ 1 week after treatment) | 1.acupuncture vs sham acupuncture                                                          | Cochrane risk of bias tool |                                   |
|    |                      |        |                            |                       |    |      |                                                                                      | 2.Shoulder pain after the end of an intervention period ( $\leq$ 1 week after treatment)   |                            | 2.acupuncture vs sham acupuncture |
|    |                      |        |                            |                       |    |      |                                                                                      | 3.Myofascial pain after the end of an intervention period ( $\leq$ 1 week after treatment) |                            | 3.acupuncture vs sham acupuncture |
|    |                      |        |                            |                       |    |      |                                                                                      | 4.Arm pain after the end of an intervention period ( $\leq$ 1 week after treatment)        |                            | 4.acupuncture vs sham acupuncture |
| 40 | Kim Jiwon<br>2019    | Korean | Connective tissue diseases | Fibromyalgia syndrome | 10 | 690  | 1.Intensity of Pain                                                                  | 1.manual acupuncture/electro-acupuncture vs sham acupuncture                               | Cochrane risk of bias tool |                                   |
|    |                      |        |                            |                       |    |      | 2.Sleep Quality (PSQI)                                                               | 2.manual acupuncture/electro-acupuncture vs sham acupuncture                               |                            |                                   |
|    |                      |        |                            |                       |    |      | 3.Fatigue                                                                            | 3.manual acupuncture/electro-acupuncture vs sham acupuncture                               |                            |                                   |

|    |                      |       |                                 |                             |    |      |                                                                               |                                                           |                            |
|----|----------------------|-------|---------------------------------|-----------------------------|----|------|-------------------------------------------------------------------------------|-----------------------------------------------------------|----------------------------|
| 41 | Zhou Longyun<br>2016 | China | Connective tissue diseases      | Primary osteoporosis        | 17 | 1369 | 1.Pain (VAS)                                                                  | 1. body needling/ electro-acupuncture vs western medicine | Jadad score                |
| 42 | Wang Kaili<br>2019   | China | Connective tissue diseases      | Postmenopausal osteoporosis | 10 | 710  | 1.Reduction in pain degree (VAS)                                              | 1. acupuncture vs western medicine                        | Cochrane risk of bias tool |
| 43 | Mei Ji<br>2015       | China | Connective tissue diseases      | Sciatica                    | 12 | 1842 | 1.Pain Intensity (VAS)                                                        | 1.acupuncture/electro-acupuncture vs western medicine     | Cochrane risk of bias tool |
| 44 | Yun-xia Li<br>2018   | China | Connective tissue diseases      | Non-specific low back pain  | 26 | 7618 | 1.Pain (VAS)                                                                  | 1.manual acupuncture vs no intervention                   | Cochrane risk of bias tool |
|    |                      |       |                                 |                             |    |      | 2.Pain (VAS) in the immediate term ( $\leq 1$ week after treatment)           | 2.manual acupuncture vs sham acupuncture                  |                            |
|    |                      |       |                                 |                             |    |      | 3.Pain (VAS) in the short term (within 1 week to 3 months after treatment)    | 3.manual acupuncture vs sham acupuncture                  |                            |
|    |                      |       |                                 |                             |    |      | 4.Pain (VAS) in the intermediate term (within 3 to 12 months after treatment) | 4.manual acupuncture vs sham acupuncture                  |                            |
| 45 | Jiaojun He<br>2019   | China | Ear, nose, and throat disorders | Meniere's disease           | 12 | 903  | 1.Severity of Dizziness Handicap (DHI)                                        | 1.acupuncture vs western medicine                         | Cochrane risk of bias tool |
| 46 | Jinzhang<br>2017     | China | Ear, nose, and throat           | Allergic rhinitis           | 11 | 1805 | 1.Improvement of nasal symptoms (TNSS)                                        | 1.acupuncture vs sham acupuncture                         | Jadad score                |

|    |                    |       |                            |                                |    |      |                                                                    |                                                               |                                          |
|----|--------------------|-------|----------------------------|--------------------------------|----|------|--------------------------------------------------------------------|---------------------------------------------------------------|------------------------------------------|
|    |                    |       | disorders                  |                                |    |      | 2.Improvement of nasal symptoms (TNSS)                             | 2. acupuncture vs western medicine                            |                                          |
| 47 | Lizhong Yu 2019    | China | Eye disorders              | Dry eye syndrome               | 11 | 852  | 1.Symptom scores                                                   | 1.acupuncture/electro-acupuncture vs western medicine         | Jadad score                              |
| 48 | Kai Zhang 2019     | China | Gastrointestinal disorders | Acute pancreatitis             | 12 | 841  | 1.Mortality during the treatment                                   | 1.electro-acupuncture+ routine treatment vs routine treatment | Cochrane risk of bias tool               |
|    |                    |       |                            |                                |    |      | 2.Rate of transfer to surgery or ICU                               | 2.electro-acupuncture+ routine treatment vs routine treatment |                                          |
|    |                    |       |                            |                                |    |      | 3.Changes in chronic health evaluation (APACHE II)                 | 3.electro-acupuncture+ routine treatment vs routine treatment |                                          |
| 49 | Haizhen Zheng 2019 | China | Gastrointestinal disorders | Irritable bowel syndrome (IBS) | 41 | 3440 | 1.IBS symptom scores                                               | 1.acupuncture vs sham acupuncture                             | Cochrane risk of bias tool               |
|    |                    |       |                            |                                |    |      | 2.Quality of life                                                  | 2. acupuncture vs sham acupuncture                            |                                          |
| 50 | Lu Wang 2020       | China | Gastrointestinal disorders | Functional constipation        | 28 | 3525 | 1.Complete spontaneous bowel movement                              | 1.acupuncture vs sham acupuncture                             | Cochrane risk of bias tool               |
|    |                    |       |                            |                                |    |      | 2.Symptoms improvement (CSS)                                       | 2.acupuncture vs sham acupuncture                             |                                          |
|    |                    |       |                            |                                |    |      | 3.Patient assessment of constipation quality of Life questionnaire | 3.acupuncture vs sham acupuncture                             |                                          |
| 51 | Xin Jin 2018       | China | Gastrointestinal disorders | Functional dyspepsia           | 20 | 1310 | 1.Quality of life (NDI-QOLS)                                       | 1.acupuncture/electro-acupuncture vs western medicine         | Cochrane risk of bias tool + Jadad score |
|    |                    |       |                            |                                |    |      | 2.Symptom scores                                                   | 2.acupuncture/electro-acupuncture                             |                                          |

|    |                       |        |                               |                                    |    |      |                                                                     | e<br>vs western medicine                                     |                                  |
|----|-----------------------|--------|-------------------------------|------------------------------------|----|------|---------------------------------------------------------------------|--------------------------------------------------------------|----------------------------------|
|    |                       |        |                               |                                    |    |      | 3.Symptom scores                                                    | 3.acupuncture vs western medicine                            |                                  |
| 52 | Yao Tian<br>2017      | China  | Gastrointestinal<br>disorders | Peptic ulcer                       | 16 | 1570 | 1.The healing rate of ulcer<br>area                                 | 1.acupuncture vs western medicine                            | Cochrane<br>risk of bias<br>tool |
|    |                       |        |                               |                                    |    |      | 2.The recurrence rate                                               | 2. acupuncture vs western<br>medicine                        |                                  |
| 53 | Xuhan Wu<br>2019      | China  | Gastrointestinal<br>disorders | Gastroesophageal<br>reflux disease | 26 | 2155 | 1.Symptom scores                                                    | 1.acupuncture/electro-acupunctur<br>e vs western medicine    | Cochrane<br>risk of bias<br>tool |
| 54 | Kun Hyung<br>Kim 2018 | Korean | Gastrointestinal<br>disorders | Symptomatic<br>gastroparesis       | 32 | 2601 | 1.Symptoms improvement<br>(within 4 to 12 weeks after<br>treatment) | 1.acupuncture vs sham<br>acupuncture                         | Cochrane<br>risk of bias<br>tool |
|    |                       |        |                               |                                    |    |      | 2.Symptoms improvement<br>(within 4 to 12 weeks after<br>treatment) | 2.acupuncture vs western medicine                            |                                  |
| 55 | Xindong Qin<br>2020   | China  | Genitourinary<br>disorders    | Urinary infection                  | 5  | 341  | 1.Composite cure rate                                               | 1.acupuncture vs western medicine                            | Cochrane<br>risk of bias<br>tool |
|    |                       |        |                               |                                    |    |      | 2.Recurrence                                                        | 2.acupuncture vs no intervention                             |                                  |
|    |                       |        |                               |                                    |    |      | 3.Recurrence                                                        | 3.acupuncture vs sham<br>acupuncture                         |                                  |
| 56 | JunjunLi<br>2020      | China  | Genitourinary<br>disorders    | Chronic prostatitis                | 11 | 748  | 1.Symptoms improvement<br>(NIH-CPSI total score)                    | 1.acupuncture<br>/electro-acupuncture vs sham<br>acupuncture | Cochrane<br>risk of bias<br>tool |
|    |                       |        |                               |                                    |    |      | 2.Improvement of pain in<br>chronic prostatitis                     | 2.acupuncture<br>/electro-acupuncture vs sham                |                                  |

|    |                       |       |                            |                                 |    |      |                                                                                     |                                                              |                                  |
|----|-----------------------|-------|----------------------------|---------------------------------|----|------|-------------------------------------------------------------------------------------|--------------------------------------------------------------|----------------------------------|
|    |                       |       |                            |                                 |    |      | (NIH-CPSI pain domain sub-score)                                                    | acupuncture                                                  |                                  |
|    |                       |       |                            |                                 |    |      | 3.Improvement of voiding in chronic prostatitis (NIH-CPSI voiding domain sub-score) | 3.acupuncture<br>/electro-acupuncture vs sham<br>acupuncture |                                  |
|    |                       |       |                            |                                 |    |      | 4.Quality of life (NIH-CPSI quality of life domain sub-score)                       | 4.acupuncture<br>/electro-acupuncture vs sham<br>acupuncture |                                  |
|    |                       |       |                            |                                 |    |      | 5.Symptoms improvement (IPSS)                                                       | 5.acupuncture<br>/electro-acupuncture vs sham<br>acupuncture |                                  |
|    |                       |       |                            |                                 |    |      | 6.Symptoms improvement (NIH-CPSI total score)                                       | 6.acupuncture<br>/electro-acupuncture vs western<br>medicine |                                  |
| 57 | Wei Zhang<br>2017     | China | Genitourinary<br>disorders | Benign prostatic<br>hyperplasia | 8  | 661  | 1.Symptoms improvement (IPSS) (short-term) (within 4 to 6 weeks after treatment)    | 1.acupuncture vs sham<br>acupuncture                         | Cochrane<br>risk of bias<br>tool |
|    |                       |       |                            |                                 |    |      | 2.Symptoms improvement (IPSS) (medium-term) (within 12 to 18 weeks after treatment) | 2.acupuncture vs sham<br>acupuncture                         |                                  |
| 58 | Kun Hyung<br>Kim 2016 | China | Genitourinary<br>disorders | Chronic kidney<br>disease       | 24 | 1787 | 1.Depression (BDI)                                                                  | 1.acupressure vs routine care                                | Cochrane<br>risk of bias         |
|    |                       |       |                            |                                 |    |      | 2.Depression (BDI)                                                                  | 2.TENS vs routine care                                       |                                  |

|    |                         |       |               |                      |    |      |                                                   |                                                                                                |                                                   |
|----|-------------------------|-------|---------------|----------------------|----|------|---------------------------------------------------|------------------------------------------------------------------------------------------------|---------------------------------------------------|
|    |                         |       |               |                      |    |      | 3.Sleep quality                                   | 3.acupressure vs routine care                                                                  | tool                                              |
|    |                         |       |               |                      |    |      | 4.Sleep quality                                   | 4.TENS vs routine care                                                                         |                                                   |
|    |                         |       |               |                      |    |      | 5.Sleep quality                                   | 5.acupressure vs western medicine                                                              |                                                   |
|    |                         |       |               |                      |    |      | 6.Fatigue                                         | 6.acupressure vs routine care                                                                  |                                                   |
| 59 | Charlotte Southern 2016 | UK    | Mental health | Alcohol use disorder | 15 | 1378 | 1.Alcohol craving                                 | 1. body needling/<br>electro-acupuncture/ear<br>(auricular) acupuncture vs sham<br>acupuncture | Cochrane<br>risk of bias<br>tool +<br>Jadad score |
|    |                         |       |               |                      |    |      | 2.Alcohol withdrawal<br>symptoms                  | 2.electro-acupuncture/ear<br>(auricular) acupuncture vs sham<br>acupuncture                    |                                                   |
|    |                         |       |               |                      |    |      | 3.Alcohol withdrawal<br>symptoms                  | 3.electro-acupuncture/ear<br>(auricular) acupuncture vs sham<br>acupuncture                    |                                                   |
| 60 | Zhihan Chen 2018        | China | Mental health | Opioid use disorder  | 9  | 1063 | 1.Number of positive urine<br>samples for opioids | 1.ear (auricular) acupuncture vs<br>sham acupuncture                                           | Cochrane<br>risk of bias<br>tool                  |
|    |                         |       |               |                      |    |      | 2.Craving for opioid                              | 2.electro-acupuncture vs no<br>intervention                                                    |                                                   |
|    |                         |       |               |                      |    |      | 3.Craving for opioid                              | 3.electro-acupuncture/ear<br>(auricular) acupuncture/TENS vs<br>sham acupuncture               |                                                   |
|    |                         |       |               |                      |    |      | 4.Craving for opioid                              | 4.manual acupuncture vs western<br>medicine                                                    |                                                   |
|    |                         |       |               |                      |    |      | 5.Depression                                      | 5.electro-acupuncture vs no<br>intervention                                                    |                                                   |



|    |                       |           |               |                       |    |      |                                                                   |                                                             |                            |
|----|-----------------------|-----------|---------------|-----------------------|----|------|-------------------------------------------------------------------|-------------------------------------------------------------|----------------------------|
|    |                       |           |               |                       |    |      | 6. Depression                                                     | 6. electro-acupuncture vs sham acupuncture                  |                            |
| 61 | Jian-Hua Wang 2019    | China     | Mental health | Smoking cessation     | 24 | 3984 | 1. Abstinence rate (short-term) ( $\leq$ 4 weeks after treatment) | 1. head and eye acupuncture vs no intervention              | Cochrane risk of bias tool |
|    |                       |           |               |                       |    |      | 2. Abstinence rate (long-term) ( $>$ 6 months after treatment)    | 2. head and eye acupuncture vs no intervention              |                            |
|    |                       |           |               |                       |    |      | 3. Abstinence rate (short-term) ( $\leq$ 4 weeks)                 | 3. head and eye acupuncture vs nicotine replacement therapy |                            |
|    |                       |           |               |                       |    |      | 4. Abstinence rate (long-term) ( $>$ 6 months)                    | 4. head and eye acupuncture vs nicotine replacement therapy |                            |
|    |                       |           |               |                       |    |      | 5. Nicotine withdrawal symptoms (short-term) ( $\leq$ 4 weeks)    | 5. body needling/ear acupuncture vs sham acupuncture        |                            |
|    |                       |           |               |                       |    |      | 6. Nicotine withdrawal symptoms (short-term) ( $\leq$ 4 weeks)    | 6. body needling vs nicotine replacement therapy            |                            |
| 62 | Caroline A Smith 2018 | Australia | Mental health | Depression            | 64 | 7104 | 1. Severity of depression at the end of treatment                 | 1. manual acupuncture vs no intervention                    | Cochrane risk of bias tool |
|    |                       |           |               |                       |    |      | 2. Quality of life (emotional) during treatment                   | 2. electro-acupuncture vs sham acupuncture                  |                            |
|    |                       |           |               |                       |    |      | 3. Severity of depression at the end of treatment                 | 3. manual acupuncture vs western medicine                   |                            |
| 63 | Wei Li 2019           | China     | Mental health | Postpartum depression | 8  | 517  | 1. Depression (HAMD)                                              | 1. manual acupuncture vs western medicine                   | Cochrane risk of bias      |

|    |                    |       |               |                                      |    |      |                                                                         |                                                               |                            |
|----|--------------------|-------|---------------|--------------------------------------|----|------|-------------------------------------------------------------------------|---------------------------------------------------------------|----------------------------|
|    |                    |       |               |                                      |    |      | 2.Depression (HAMD)                                                     | 2.manual acupuncture vs psychological therapy                 | tool                       |
|    |                    |       |               |                                      |    |      | 3.Overall effect (EPDS)                                                 | 3.manual acupuncture vs sham acupuncture                      |                            |
|    |                    |       |               |                                      |    |      | 4. Overall effect (EPDS)                                                | 4.acupuncture + psychological therapy vs western medicine     |                            |
| 64 | Sean Grant<br>2018 | USA   | Mental health | Posttraumatic stress disorder (PTSD) | 7  | 709  | 1.PTSD symptoms (post-intervention)                                     | 1.electro-acupuncture vs western medicine                     | Cochrane risk of bias tool |
|    |                    |       |               |                                      |    |      | 2.PTSD symptoms (follow-up for 1 to 6 months)                           | 2.electro-acupuncture vs western medicine                     |                            |
|    |                    |       |               |                                      |    |      | 3.Physical health-related quality of life (follow-up for 4 to 12 weeks) | 3. body needling vs standard of care                          |                            |
|    |                    |       |               |                                      |    |      | 4.Mental health-related quality of life (follow-up for 4 to 12 weeks)   | 4. body needling vs standard of care                          |                            |
|    |                    |       |               |                                      |    |      | 5.Functional status (post-intervention)                                 | 5. body needling vs no intervention                           |                            |
|    |                    |       |               |                                      |    |      | 6.Functional status (follow-up for 3 months)                            | 6. body needling vs no intervention                           |                            |
| 65 | Ning Sun<br>2020   | China | Mental health | Chronic pain emotional disorder      | 12 | 2450 | 1.Emotional health (MSQ) -immediate effect                              | 1.manual acupuncture /electro-acupuncture vs sham acupuncture | Cochrane risk of bias tool |
|    |                    |       |               |                                      |    |      | 2.Emotional health (SF36/SF12)-immediate                                | 2.manual acupuncture /electro-acupuncture vs sham             |                            |

|    |                          |        |                                                    |                                |    |      | effect                                                                     | acupuncture                                                                   |                                  |
|----|--------------------------|--------|----------------------------------------------------|--------------------------------|----|------|----------------------------------------------------------------------------|-------------------------------------------------------------------------------|----------------------------------|
|    |                          |        |                                                    |                                |    |      | 3.Emotional health (MSQ)<br>-persistent effects (follow up for 3 months)   | 3.manual acupuncture<br>/electro-acupuncture vs sham<br>acupuncture           |                                  |
|    |                          |        |                                                    |                                |    |      | 4.Emotional health (SF36/SF12)-persistent effects (follow up for 3 months) | 4.manual acupuncture<br>/electro-acupuncture vs sham<br>acupuncture           |                                  |
| 66 | Qing Zhang<br>2018       | China  | Mental health                                      | Chronic fatigue syndrome (CFS) | 16 | 1346 | 1.Mental fatigue score of CFS                                              | 1.manual acupuncture vs sham<br>acupuncture                                   | Cochrane<br>risk of bias<br>tool |
|    |                          |        |                                                    |                                |    |      | 2.Physical fatigue score of CFS                                            | 2.manual acupuncture vs sham<br>acupuncture                                   |                                  |
| 67 | Yu-Mei<br>Zhong<br>2019  | China  | Nutrition and metabolic disorders                  | Simple obesity                 | 9  | 473  | 1.The reduction of body mass index (BMI)                                   | 1.body needling<br>/electro-acupuncture/ear<br>acupuncture vs no intervention | Cochrane<br>risk of bias<br>tool |
| 68 | Eun-Young<br>Nam<br>2018 | Korean | Obstetrics,<br>gynecology<br>and women's<br>health | Menopausal hot<br>flashes      | 9  | 1324 | 1.Hot flash frequency ( $\leq 12$ weeks)                                   | 1.manual acupuncture vs sham<br>acupuncture                                   | Cochrane<br>risk of bias<br>tool |
|    |                          |        |                                                    |                                |    |      | 2.Hot flash frequency ( $>12$ weeks)                                       | 2.manual acupuncture vs sham<br>acupuncture                                   |                                  |
|    |                          |        |                                                    |                                |    |      | 3.Hot flash frequency (4 weeks after treatment started)                    | 3.manual acupuncture vs no<br>intervention                                    |                                  |
|    |                          |        |                                                    |                                |    |      | 3. Hot flash frequency ( $\geq 12$ weeks after treatment started)          | 4. manual acupuncture vs no<br>intervention                                   |                                  |

|    |                       |           |                                           |                                     |    |      |                                                                                                |                                                               |                            |
|----|-----------------------|-----------|-------------------------------------------|-------------------------------------|----|------|------------------------------------------------------------------------------------------------|---------------------------------------------------------------|----------------------------|
|    |                       |           |                                           |                                     |    |      | 5.Hot flash severity (VAS)(≤12 weeks)                                                          | 5.manual acupuncture vs sham acupuncture                      |                            |
|    |                       |           |                                           |                                     |    |      | 6.Hot flash severity (VAS)(>12 weeks)                                                          | 6.manual acupuncture vs sham acupuncture                      |                            |
| 69 | Weihan Li 2017        | China     | Obstetrics, gynecology and women's health | Quality of life in menopausal women | 6  | 419  | 1.Quality of life in menopausal women (MRS)-at end of treatment                                | 1.acupuncture vs sham acupuncture                             | Cochrane risk of bias tool |
|    |                       |           |                                           |                                     |    |      | 2.Menopause rating scale (MRS) -at the follow-up period (within 1 to 3 months after treatment) | 2.acupuncture vs sham acupuncture                             |                            |
| 70 | Caroline A Smith 2020 | Australia | Obstetrics, gynecology and women's health | Pain during labour                  | 28 | 3960 | 1.Pain intensity (VAS)                                                                         | 1.manual acupuncture/ electro-acupuncture vs sham acupuncture | Cochrane risk of bias tool |
|    |                       |           |                                           |                                     |    |      | 2.Pain intensity (VAS)                                                                         | 2.manual acupuncture/ electro-acupuncture vs standard of care |                            |
|    |                       |           |                                           |                                     |    |      | 3.Pain intensity (VAS)                                                                         | 3.electro-acupuncture vs no intervention                      |                            |
|    |                       |           |                                           |                                     |    |      | 4.Pain intensity (VAS)                                                                         | 4.acupressure vs sham acupuncture                             |                            |
|    |                       |           |                                           |                                     |    |      | 5.Pain intensity (VAS)                                                                         | 5.acupressure vs standard of care                             |                            |
| 71 | Ying Tang 2017        | China     | Obstetrics, gynecology and women's        | Postpartum lactating                | 9  | 1187 | 1.The effective rate of lactation within 24 hours after delivery                               | 1.acupressure vs standard of care                             | Cochrane risk of bias tool |

|    |                       |           |                                           |                              |    |                                                                  |                                                                  |                                                          |                            |
|----|-----------------------|-----------|-------------------------------------------|------------------------------|----|------------------------------------------------------------------|------------------------------------------------------------------|----------------------------------------------------------|----------------------------|
|    |                       |           | health                                    |                              |    |                                                                  | 2.The effective rate of lactation within 48 hours after delivery | 2.acupressure vs standard of care                        |                            |
|    |                       |           |                                           |                              |    |                                                                  | 3. Adequacy ratio of lactation within 24 hours after delivery    | 3.acupressure vs standard of care                        |                            |
|    |                       |           |                                           |                              |    |                                                                  | 4. Adequacy ratio of lactation within 48 hours after delivery    | 4.acupressure vs standard of care                        |                            |
|    |                       |           |                                           |                              |    |                                                                  | 5. Adequacy ratio of lactation within 72 hours after delivery    | 5.acupressure vs standard of care                        |                            |
| 72 | Yanjuan Song 2019     | China     | Obstetrics, gynecology and women's health | Chronic pelvic pain syndrome | 12 | 1027                                                             | 1.Symptoms improvement (NIH-CPSI)                                | 1. body needling/electro-acupuncture vs western medicine | Cochrane risk of bias tool |
| 73 | Caroline A Smith 2016 | Australia | Obstetrics, gynecology and women's health | Dysmenorrhea                 | 46 | 4912                                                             | 1.Improvement in menstrual symptoms at 3 months after treatment  | 1. body acupuncture vs sham acupuncture                  | Cochrane risk of bias tool |
|    |                       |           |                                           |                              |    | 2.Improvement in menstrual symptoms at 12 months after treatment | 2.traditional body acupuncture vs sham acupuncture               |                                                          |                            |
|    |                       |           |                                           |                              |    | 3.Quality of life: physical health                               | 3.manual acupuncture vs sham acupuncture                         |                                                          |                            |
|    |                       |           |                                           |                              |    | 4.Quality of life: mental health                                 | 4.manual acupuncture vs sham acupuncture                         |                                                          |                            |

|    |                   |       |                                 |                                         |    |      |                           |                                                                |                            |
|----|-------------------|-------|---------------------------------|-----------------------------------------|----|------|---------------------------|----------------------------------------------------------------|----------------------------|
|    |                   |       |                                 |                                         |    |      | 5.Pain relief             | 5.body needling/manual acupuncture vs western medicine         |                            |
|    |                   |       |                                 |                                         |    |      | 6.Menstrual symptom score | 6. body needling/manual acupuncture vs western medicine        |                            |
| 74 | Xiaojuan Liu 2020 | China | Pregnancy or intended pregnancy | Luteinized unruptured follicle syndrome | 10 | 715  | 1.Ovulation rate          | 1.acupuncture vs western medicine                              | Cochrane risk of bias tool |
|    |                   |       |                                 |                                         |    |      | 2.Pregnancy rate          | 2.acupuncture vs western medicine                              |                            |
| 75 | Liu Yun 2019      | China | Pregnancy or intended pregnancy | Infertility                             | 22 | 2591 | 1.Pregnancy rate          | 1.acupuncture and auricular point sticking vs western medicine | Cochrane risk of bias tool |
| 76 | Zhengyun Xie 2019 | China | Pregnancy or intended pregnancy | In vitro Fertilization-embryo transfer  | 27 | 6116 | 1.Clinical pregnancy rate | 1.manual acupuncture /electro-acupuncture vs sham acupuncture  | Cochrane risk of bias tool |
|    |                   |       |                                 |                                         |    |      | 2.Live birth rate         | 2.manual acupuncture /electro-acupuncture vs sham acupuncture  |                            |
|    |                   |       |                                 |                                         |    |      | 3.Miscarriage rate        | 3.manual acupuncture /electro-acupuncture vs no intervention   |                            |
|    |                   |       |                                 |                                         |    |      | 4.Clinical pregnancy rate | 4.manual acupuncture electro-acupuncture vs no intervention    |                            |
|    |                   |       |                                 |                                         |    |      | 5.Live birth rate         | 5.manual acupuncture/electro-acupuncture vs no intervention    |                            |
| 77 | Rupsa C.          | USA   | Pregnancy or                    | Hyperemesis                             | 1  | 81   | 1.Reduction of nausea     | 1.acupuncture vs western medicine                              | Cochrane                   |

|    |                      |       |                       |                                                        |   |     |                                                                     |                                                               |                                  |
|----|----------------------|-------|-----------------------|--------------------------------------------------------|---|-----|---------------------------------------------------------------------|---------------------------------------------------------------|----------------------------------|
|    | Boelig<br>2018       |       | intended<br>pregnancy | gravidarum                                             |   |     | 2.Reduction in vomiting                                             | 2.acupuncture vs western medicine                             | risk of bias<br>tool             |
| 78 | Chien, T. J.<br>2017 | China | Oncology              | Breast<br>cancer-related<br>menopause<br>symptoms      | 8 | 504 | 1. The frequency of hot<br>flush                                    | 1.acupuncture vs sham<br>acupuncture                          | Jadad scale                      |
|    |                      |       |                       |                                                        |   |     | 2. The severity of hot flush<br>(VAS)                               | 2. acupuncture/electro-<br>acupuncture vs sham acupuncture    |                                  |
|    |                      |       |                       |                                                        |   |     | 3. Menopausal symptoms<br>(Kupperman Index)                         | 3.acupuncture/electro-<br>acupuncture vs sham acupuncture     |                                  |
| 79 | Chiu, H. Y.<br>2016  | China | Oncology              | Breast<br>cancer-related<br>menopause<br>symptoms      | 7 | 342 | 1.The hot-flash frequency<br>(short-term effects)                   | 1.acupuncture/electro-acupunctur<br>e vs sham acupuncture     | Cochrane<br>risk of bias<br>tool |
|    |                      |       |                       |                                                        |   |     | 2.The hot-flash severity<br>(short-term effects)                    | 2. acupuncture vs sham<br>acupuncture                         |                                  |
|    |                      |       |                       |                                                        |   |     | 3.The menopause-related<br>Symptoms<br>(short-term effects)         | 3. electro -acupuncture vs sham<br>acupuncture                |                                  |
|    |                      |       |                       |                                                        |   |     | 4.The hot-flash frequency<br>(intermediate-term effects)            | 4.acupuncture/electro-acupunctur<br>e vs sham acupuncture     |                                  |
|    |                      |       |                       |                                                        |   |     | 5. The hot-flash severity<br>(intermediate-term effects)            | 5. acupuncture vs sham<br>acupuncture                         |                                  |
|    |                      |       |                       |                                                        |   |     | 6. The menopause-related<br>symptoms<br>(intermediate-term effects) | 6. acupuncture/<br>electro-acupuncture vs sham<br>acupuncture |                                  |
| 80 | Chien, T. J.<br>2015 | China | Oncology              | Aromatase<br>inhibitor-induced<br>arthralgia in breast | 5 | 207 | 1. Joint pain (BPI-SF)                                              | 1.acupuncture/electro-acupunctur<br>e vs sham acupuncture     | Jadad scale                      |
|    |                      |       |                       |                                                        |   |     | 2.Joint stiffness                                                   | 2.acupuncture/electro-acupunctur                              |                                  |

|    |                       |       |           | cancer                                   |    |      | (WOMAC)                                                    | e vs sham acupuncture                        |                                  |
|----|-----------------------|-------|-----------|------------------------------------------|----|------|------------------------------------------------------------|----------------------------------------------|----------------------------------|
| 81 | WU Junying<br>2018    | China | Neurology | Post-stroke<br>shoulder-hand<br>syndrome | 14 | 1043 | 1.The shoulder-hand<br>syndrome assessment<br>score (SHSS) | 1. acupuncture vs rehabilitation             | Jadad scale                      |
|    |                       |       |           |                                          |    |      | 2.The upper limb motor<br>function (FMA)                   | 2. acupuncture vs rehabilitation             |                                  |
|    |                       |       |           |                                          |    |      | 3.Pain (VAS)                                               | 3. acupuncture vs rehabilitation             |                                  |
| 82 | LIU Kai               | China | Neurology | Post-stroke<br>shoulder-hand<br>syndrome | 7  | 401  | 2.The upper limb motor<br>function (FMA)                   | 1.acupuncture vs rehabilitation              | Cochrane<br>risk of bias<br>tool |
|    |                       |       |           |                                          |    |      | 2.Activities of daily living                               | 2. acupuncture vs rehabilitation             |                                  |
| 83 | QUE Fangxu            | China | Neurology | Post-stroke<br>depression                | 18 | 1813 | 1. Depression (HAMD-17)                                    | 1.acupuncture vs western medicine            | Cochrane<br>risk of bias<br>tool |
|    |                       |       |           |                                          |    |      | 2. Depression (HAMD-24)                                    | 2.acupuncture vs western medicine            |                                  |
| 84 | Qian Wang<br>2016     | China | Neurology | Post-stroke<br>depression                | 27 | 1729 | 1. Depression (HAMD)                                       | 1.acupuncture vs western medicine            | Cochrane<br>risk of bias<br>tool |
| 85 | Jie Zhan<br>2016      | China | Neurology | Post-stroke<br>depression                | 14 | 1180 | 1. Depression (HAMD)                                       | 1.electro-acupuncture vs western<br>medicine | Cochrane<br>risk of bias<br>tool |
| 86 | Chengyong<br>Liu 2020 | China | Neurology | Insomnia disorder                        | 13 | 1061 | 1.Sleep quality (PSQI)                                     | 1.acupuncture vs sham<br>acupuncture         | Cochrane<br>risk of bias<br>tool |
| 87 | Longcong<br>Dong 2019 | China | Neurology | Insomnia disorder                        | 11 | 792  | 1.Sleep quality (PSQI)                                     | 1.acupuncture vs western medicine            | Cochrane<br>risk of bias<br>tool |



|    |                      |         |           |                   |    |      |                                                                 |                                                |                                  |
|----|----------------------|---------|-----------|-------------------|----|------|-----------------------------------------------------------------|------------------------------------------------|----------------------------------|
| 88 | Waits, A<br>2018     | China   | Neurology | Insomnia disorder | 13 | 968  | 1.Sleep quality (PSQI)                                          | 1.acupressure vs sham acupressure              | Cochrane<br>risk of bias<br>tool |
| 89 | Lan Y 2015           | China   | Neurology | Insomnia disorder | 15 | 1429 | 1.Sleep quality (PSQI)                                          | 1.auricular acupuncture vs sham<br>acupuncture | Cochrane<br>risk of bias<br>tool |
|    |                      |         |           |                   |    |      | 2.Sleep quality (PSQI)                                          | 2.auricular acupuncture vs western<br>medicine |                                  |
| 90 | Wenfang<br>Song 2019 | China   | Neurology | Insomnia disorder | 7  | 474  | 1.Sleep quality (PSQI)                                          | 1.acupuncture vs standard of care              | Cochrane<br>risk of bias<br>tool |
| 91 | Cui Qiuyue<br>2018   | China   | Neurology | Migraine          | 15 | 1288 | 1.Pain (immediate-term)                                         | 1.acupuncture vs sham<br>acupuncture           | Cochrane<br>risk of bias<br>tool |
|    |                      |         |           |                   |    |      | 2.Pain (short-term)                                             | 2.acupuncture vs sham<br>acupuncture           |                                  |
|    |                      |         |           |                   |    |      | 3.Pain (long-term)                                              | 3.acupuncture vs sham<br>acupuncture           |                                  |
| 92 | Linde K<br>2016      | Germany | Neurology | Migraine          | 22 | 4985 | 1.Headache frequency<br>(after treatment)                       | 1.acupuncture vs no acupuncture                | Cochrane<br>risk of bias<br>tool |
|    |                      |         |           |                   |    |      | 2.Headache frequency<br>(after treatment)                       | 2.acupuncture vs sham<br>acupuncture           |                                  |
|    |                      |         |           |                   |    |      | 3.Headache frequency<br>(after treatment)                       | 3.acupuncture vs western medicine              |                                  |
|    |                      |         |           |                   |    |      | 4.Headache frequency<br>(follow-up for 3 weeks to<br>12 months) | 4.acupuncture vs no intervention               |                                  |
|    |                      |         |           |                   |    |      | 5.Headache frequency                                            | 5.acupuncture vs sham                          |                                  |

|    |                    |       |                                 |                            |    |      |                                                           |                                   |                            |
|----|--------------------|-------|---------------------------------|----------------------------|----|------|-----------------------------------------------------------|-----------------------------------|----------------------------|
|    |                    |       |                                 |                            |    |      | (follow-up for 3 weeks to 12 months)                      | acupuncture                       |                            |
|    |                    |       |                                 |                            |    |      | 6.Headache frequency (follow-up for 3 weeks to 12 months) | 6.acupuncture vs western medicine |                            |
| 93 | Pu Shengxiong 2016 | China | Neurology                       | Migraine acute Attack      | 5  | 618  | 1.Pain (VAS)- 2 hours after treatment                     | 1.acupuncture vs sham acupuncture | Cochrane risk of bias tool |
|    |                    |       |                                 |                            |    |      | 2.Pain (VAS)- 4 hours after treatment                     | 2.acupuncture vs sham acupuncture |                            |
| 94 | Jinna Yu 2016      | China | Neurology                       | Tourette syndrome          | 7  | 564  | 1.Severity of tics (YGTSS)                                | 1.acupuncture vs western medicine | Cochrane risk of bias tool |
| 95 | Lien-Chen Wu 2018  | China | Connective tissue diseases      | Chronic back pain          | 12 | 700  | 1.Pain (VAS/BPS)                                          | 1.TENS vs sham acupuncture        | Cochrane risk of bias tool |
|    |                    |       |                                 |                            |    |      | 2.Pain (VAS/BPS)                                          | 2.TENS vs sham acupuncture        |                            |
| 96 | Feifan Liang 2016  | China | Connective tissue diseases      | Non-specific low back pain | 10 | 751  | 1.Function improvement (ODI)                              | 1.acupuncture vs western medicine | Cochrane risk of bias tool |
|    |                    |       |                                 |                            |    |      | 2.Pain (VAS)                                              | 2.acupuncture vs sham acupuncture |                            |
|    |                    |       |                                 |                            |    |      | 3.Function improvement (RMDQ)                             | 3.acupuncture vs sham acupuncture |                            |
| 97 | Zhiqing Liu 2017   | China | Ear, nose, and throat disorders | Allergic rhinitis          | 10 | 552  | 1.Symptom scores                                          | 1.acupuncture vs western medicine | Cochrane risk of bias tool |
| 98 | Zhang Jin          | China | Ear, nose, and                  | Allergic rhinitis          | 11 | 1805 | 1. Reducing of nasal                                      | 1. manual acupuncture vs sham     | Jadad score                |

|     |                       |       |                            |                         |    |      |                                          |                                                              |                            |
|-----|-----------------------|-------|----------------------------|-------------------------|----|------|------------------------------------------|--------------------------------------------------------------|----------------------------|
|     | 2017                  |       | throat disorders           |                         |    |      | symptoms (TNSS)                          | acupuncture                                                  |                            |
|     |                       |       |                            |                         |    |      | 2. Reducing of nasal symptoms (TNSS)     | 2. manual acupuncture vs western medicine                    |                            |
| 99  | Lei Yang 2015         | China | Eye disorders              | Dry eye syndrome        | 7  | 383  | 1.Tear break-up time                     | 1. manual acupuncture vs western medicine                    | Cochrane risk of bias tool |
|     |                       |       |                            |                         |    |      | 2.Severity of dry eyes (Schirmer I test) | 2. manual acupuncture vs western medicine                    |                            |
| 100 | Jiang Hui-ru 2017     | China | Eye disorders              | Dry eye syndrome        | 8  | 847  | 1.Tear break-up time                     | 1. manual acupuncture vs western medicine                    | Cochrane risk of bias tool |
|     |                       |       |                            |                         |    |      | 2.Severity of dry eyes (Schirmer I test) | 2. manual acupuncture vs western medicine                    |                            |
| 101 | Zhang Jieying 2016    | China | Gastrointestinal disorders | Functional constipation | 10 | 1162 | 1.Weekly frequency of defecation         | 1.electro-acupuncture vs western medicine                    | Jadad score                |
|     |                       |       |                            |                         |    |      | 2.Symptoms improvement (CCS)             | 2.electro-acupuncture vs western medicine                    |                            |
| 102 | Peng Jieru 2018       | China | Gastrointestinal disorders | Functional dyspepsia    | 7  | 1044 | 1.Postprandial fullness                  | 1.manul acupuncture vs western medicine                      | Cochrane risk of bias tool |
|     |                       |       |                            |                         |    |      | 2.Early satiety                          | 2.manul acupuncture vs western medicine                      |                            |
|     |                       |       |                            |                         |    |      | 3.Epigastric pain                        | 3.manul acupuncture vs western medicine                      |                            |
|     |                       |       |                            |                         |    |      | 4.Epigastric burning                     | 4.manul acupuncture vs western medicine                      |                            |
| 103 | Shang-Chih Chang 2016 | China | Genitourinary disorders    | Chronic prostatitis     | 7  | 502  | 1.Symptoms improvement (NIH-CPSI)        | 1.manul acupuncture/ electro-acupuncture vs sham acupuncture | Jadad score                |

|                                                              |                                   |       |                         |                     |    |     |                                                                                    |                                                              |                            |
|--------------------------------------------------------------|-----------------------------------|-------|-------------------------|---------------------|----|-----|------------------------------------------------------------------------------------|--------------------------------------------------------------|----------------------------|
|                                                              |                                   |       |                         |                     |    |     | 2.Symptoms improvement (NIH-CPSI)                                                  | 2.electro-acupuncture vs western medicine                    |                            |
|                                                              |                                   |       |                         |                     |    |     | 3. Symptoms improvement (IPSS)                                                     | 3.manul acupuncture/ electro-acupuncture vs sham acupuncture |                            |
| 104                                                          | Qin.Z 2016                        | China | Genitourinary disorders | Chronic prostatitis | 7  | 471 | 1.Symptoms improvement (NIH-CPSI total score)                                      | 1.acupuncture vs sham acupuncture                            | Cochrane risk of bias tool |
|                                                              |                                   |       |                         |                     |    |     |                                                                                    | 2.acupuncture vs western medicine                            |                            |
|                                                              |                                   |       |                         |                     |    |     | 2.Improvement of pain in chronic prostatitis (NIH-CPSI pain domain subscore)       | 1.acupuncture vs sham acupuncture                            |                            |
|                                                              |                                   |       |                         |                     |    |     |                                                                                    | 2.acupuncture vs western medicine                            |                            |
|                                                              |                                   |       |                         |                     |    |     | 3.Improvement of voiding in chronic prostatitis (NIH-CPSI voiding domain subscore) | 1.acupuncture vs sham acupuncture                            |                            |
|                                                              |                                   |       |                         |                     |    |     |                                                                                    | 2.acupuncture vs western medicine                            |                            |
| 4.Quality of life (NIH-CPSI quality of life domain subscore) | 1.acupuncture vs sham acupuncture |       |                         |                     |    |     |                                                                                    |                                                              |                            |
|                                                              | 2.acupuncture vs western medicine |       |                         |                     |    |     |                                                                                    |                                                              |                            |
| 5.Symptoms improvement (IPSS)                                | 1.acupuncture vs sham acupuncture |       |                         |                     |    |     |                                                                                    |                                                              |                            |
| 105                                                          | Liu.B. P. 2016                    | China | Genitourinary disorders | Chronic prostatitis | 10 | 754 | 1.Symptoms improvement (NIH-CPSI total score)                                      | 1.acupuncture vs sham acupuncture                            | Cochrane risk of bias tool |
|                                                              |                                   |       |                         |                     |    |     |                                                                                    | 2.acupuncture vs western medicine                            |                            |
|                                                              |                                   |       |                         |                     |    |     | 2.Response rate                                                                    | 1.acupuncture vs sham                                        |                            |

|     |                             |           |                                   |                |    |      |                                                                                    |                                   |                            |
|-----|-----------------------------|-----------|-----------------------------------|----------------|----|------|------------------------------------------------------------------------------------|-----------------------------------|----------------------------|
|     |                             |           |                                   |                |    |      |                                                                                    | acupuncture                       |                            |
|     |                             |           |                                   |                |    |      |                                                                                    | 2.acupuncture vs western medicine |                            |
|     |                             |           |                                   |                |    |      | 3.Improvement of pain in chronic prostatitis (NIH-CPSI pain domain subscore)       | 1.acupuncture vs sham acupuncture |                            |
|     |                             |           |                                   |                |    |      |                                                                                    | 2.acupuncture vs western medicine |                            |
|     |                             |           |                                   |                |    |      | 4.Improvement of voiding in chronic prostatitis (NIH-CPSI voiding domain subscore) | 1.acupuncture vs sham acupuncture |                            |
|     |                             |           |                                   |                |    |      |                                                                                    | 2.acupuncture vs western medicine |                            |
|     |                             |           |                                   |                |    |      | 5.Quality of life (NIH-CPSI quality of life domain subscore)                       | 1.acupuncture vs sham acupuncture |                            |
|     |                             |           |                                   |                |    |      |                                                                                    | 2.acupuncture vs western medicine |                            |
| 106 | Armour. M<br>2019           | Australia | Mental health                     | Depression     | 29 | 2268 | 1.The severity of depression                                                       | 1.acupuncture vs sham acupuncture | Cochrane risk of bias tool |
| 107 | ZHANG<br>Rong-qiang<br>2017 | China     | Nutrition and metabolic disorders | Simple obesity | 6  | 236  | 1.Weight                                                                           | 1.acupuncture vs sham acupuncture | Jadad score                |
|     |                             |           |                                   |                |    |      | 2.BMI                                                                              | 3.acupuncture vs sham acupuncture |                            |
| 108 | CHEN Xia<br>2016            | China     | Nutrition and metabolic disorders | Simple obesity | 21 | 1929 | 1.Weight                                                                           | 1.acupuncture vs no intervention  | Cochrane risk of bias tool |
|     |                             |           |                                   |                |    |      |                                                                                    | 2.acupuncture vs sham acupuncture |                            |
|     |                             |           |                                   |                |    |      |                                                                                    | 3.acupuncture vs western medicine |                            |
|     |                             |           |                                   |                |    |      | 2.BMI                                                                              | 1.acupuncture vs no intervention  |                            |

|     |                        |       |                                                    |                                           |    |      |                         | 2.acupuncture vs sham<br>acupuncture         |                                  |
|-----|------------------------|-------|----------------------------------------------------|-------------------------------------------|----|------|-------------------------|----------------------------------------------|----------------------------------|
|     |                        |       |                                                    |                                           |    |      |                         | 3.acupuncture vs western medicine            |                                  |
| 109 | Xue<br>Dongqun<br>2015 | China | Nutrition and<br>metabolic<br>disorders            | Simple obesity                            | 17 | 1246 | 1.Weight                | 1. auricular pressure vs sham<br>acupuncture | Cochrane<br>risk of bias<br>tool |
|     |                        |       |                                                    |                                           |    |      | 2.BMI                   | 2. auricular pressure vs sham<br>acupuncture |                                  |
| 110 | Jianrong<br>Chen 2018  | China | Nutrition and<br>metabolic<br>disorders            | Obesity                                   | 33 | 2503 | 1.Weight                | 1.acupuncture vs no intervention             | Cochrane<br>risk of bias<br>tool |
|     |                        |       |                                                    |                                           |    |      |                         | 2.acupuncture vs no intervention             |                                  |
| 111 | Junpeng<br>Yao<br>2019 | China | Nutrition and<br>metabolic<br>disorders            | Obesity                                   | 12 | 1151 | 1.BMI                   | 1.acupuncture vs sham<br>acupuncture         | Cochrane<br>risk of bias<br>tool |
|     |                        |       |                                                    |                                           |    |      | 2.Waist circumference   | 2.acupuncture vs sham<br>acupuncture         |                                  |
| 112 | Zhang Lin<br>2015      | China | Nutrition and<br>metabolic<br>disorders            | Obesity                                   | 23 | 1836 | 1.BMI                   | 1.acupuncture vs sham<br>acupuncture         | Cochrane<br>risk of bias<br>tool |
|     |                        |       |                                                    |                                           |    |      | 2.Weight                | 2.acupuncture vs sham<br>acupuncture         |                                  |
| 113 | Kepei Zhang<br>2018    | China | Nutrition and<br>metabolic<br>disorders            | Obesity                                   | 21 | 1389 | 1.BMI                   | 1.acupuncture vs no intervention             | Cochrane<br>risk of bias<br>tool |
| 114 | Wu Qian<br>2016        | China | Obstetrics,<br>gynecology<br>and women's<br>health | Quality of life in<br>menopausal<br>women | 10 | 801  | 1.Hot flashes frequency | 1.acupuncture vs sham<br>acupuncture         | Cochrane<br>risk of bias<br>tool |
|     |                        |       |                                                    |                                           |    |      | 2.Hot flashes severity  | 2.acupuncture vs sham<br>acupuncture         |                                  |

|     |                       |       |                                           |                        |    |      |                                                      |                                   |                                                    |
|-----|-----------------------|-------|-------------------------------------------|------------------------|----|------|------------------------------------------------------|-----------------------------------|----------------------------------------------------|
| 115 | Raana Haj Najafi 2020 | China | Obstetrics, gynecology and women's health | Pain during labour     | 10 | 1271 | 1.Labour pain                                        | 1.acupressure vs sham acupuncture | Cochrane risk of bias tool                         |
|     |                       |       |                                           |                        |    |      |                                                      | 2.acupressure vs no intervention  |                                                    |
| 116 | Najafi,F. 2018        | Iran  | Obstetrics, gynecology and women's health | Pain during labour     | 16 | 1652 | 1.The severity of pain after the intervention        | 1.acupressure vs sham acupuncture | Quality criteria were not included in the analysis |
| 117 | Lixia,Lin 2020        | China | Obstetrics, gynecology and women's health | Dysmenorrhea           | 23 | 1739 | 1. Pain improvement (VAS)                            | 1.acupuncture vs western medicine | Cochrane risk of bias tool                         |
|     |                       |       |                                           |                        |    |      | 2. Symptoms improvement (Dysmenorrhea symptom score) | 2.acupuncture vs western medicine |                                                    |
| 118 | Ge,Li 2017            | China | Obstetrics, gynecology and women's health | Dysmenorrhea           | 56 | 4600 | 1.Pain improvement (VAS)                             | 1.acupuncture vs western medicine | Cochrane risk of bias tool                         |
| 119 | Ranran Gao 2019       | China | Pregnancy or intended pregnancy           | Infertility            | 9  | 1441 | 1.Pregnancy                                          | 1.acupuncture vs western medicine | Cochrane risk of bias tool                         |
|     |                       |       |                                           |                        |    |      | 2.Ovulation                                          | 2.acupuncture vs western medicine |                                                    |
|     |                       |       |                                           |                        |    |      | 3.Pregnancy loss                                     | 3.acupuncture vs western medicine |                                                    |
| 120 | Boelig,R.C 2016       | USA   | Pregnancy or intended pregnancy           | Hyperemesis gravidarum | 25 | 2052 | 1.Reduction or cessation in nausea                   | 1.acupuncture vs western medicine | Cochrane risk of bias tool                         |
|     |                       |       |                                           |                        |    |      | 2.Reduction or cessation in vomiting                 | 2.acupuncture vs western medicine |                                                    |

Note: **VAS**, Visual Analog Scale. **TENS**, Transcutaneous Electrical Nerve Stimulation. **BFI**, Brief Fatigue Inventory. **BPI**, Brief Pain Inventory. **FMA**, Fugl-Meyer Assessment. **MBI**, Modified Barthel Index. **ROM**, Range of Motion. **FMA**, Fugl-Myer Assessment. **ASS**, Ashworth Scale for Spasticity. **BI**, Barthel Index. **HAMD**, Hamilton Depression Scale. **MMSE**, Mini-mental State Examination. **ADL**, Activities of Daily Living. **MoCA**, Montreal Cognitive Assessment. **NDS**, Neurological Deficit Scale. **HDS**, Hastgawa Dementia Scale. **PSQI**, Pittsburgh Sleep Quality Index. **UPDRS**, Unified PD Rating Scale. **CARS**, Childhood Autism Rating Scale. **MSQ**, Migraine-Specific Quality of Life Questionnaire. **YGTSS**, Yale Global Tic Severity Scale. **ISOA**, Index of Severity for Osteoarthritis. **WOMAC**, Western Ontario and McMaster Universities Arthritis Index. **DHI**, Dizziness Handicap Inventory. **TNSS**, Total Nasal Symptom Score. **ICU**, Intensive Care Unit. **APACHE**, Acute Physiology, Age, Chronic Health Evaluation. **CSS**, Constipation symptoms scores. **NDI-QOLS**, Nipping Index of Quality of Life. **NIH-CPSI**, National Institute of Health Chronic Prostatitis Symptom Index. **IPSS**, International Prostate Symptom Score. **BDI**, Beck Depression Inventory. **EPDS**, Edinburgh Postnatal Depression Scale. **SF36/SF12**, the MOS 36-item short-form health survey/the MOS 12-item short-form health survey. **BMI**, Body Mass Index. **MRS**, Menopause Rating Scale. **BPI-SF**, Brief Pain Inventorye-Short Form. **BPS**, Back Performance Scale. **ODI**, Oswestry Disability Index. **RMDQ**, Roland-Morris Disability Questionnaire. **CCS**, Cleveland constipation Score.
