# Supplementary material
Source: HighWire-hosted journal article supplement (https://bmjopen.bmj.com/content/12/6/e056803)
Supplement: inline-supplementary-material-4 [file inline-supplementary-material-4.pdf]

**Oncology:**

Acupuncture for Menopause related symptoms in breast cancer patients:

<http://www.epistemonikos.org/matrixes/6052b7e77aac84d2a4bc132>

Acupuncture for Aromatase inhibitor-related arthralgia in breast cancer:

<http://www.epistemonikos.org/matrixes/605809987aac84d2a4d29c2>

Acupuncture for Breast cancer:

<http://www.epistemonikos.org/matrixes/606c97307aac82511263c9b>

Symptom Management and quality of life of cancer:

<http://www.epistemonikos.org/matrixes/60754c217aac868e925b7d1>

Acupuncture for Cancer pain:

<http://www.epistemonikos.org/matrixes/6076698a6ec0d67000198ba9>

**Neurology:**

Acupuncture for Post-stroke depression:

<http://www.epistemonikos.org/matrixes/6065516b7aac81f38258e79>

Acupuncture for Post-stroke shoulder-hand syndrome:

<http://www.epistemonikos.org/matrixes/606551f87db23a2fb7b02ff0>

Acupuncture for Migraine:

<http://www.epistemonikos.org/matrixes/60654f7a7db23a2fb8b0a125>

Acupuncture for Sleep quality in hemodialysis patients:

<http://www.epistemonikos.org/matrixes/606556a47db23a2fb6afee4b>

Acupuncture for Tic disorder:

<http://www.epistemonikos.org/matrixes/606557ee7db23a2fb8b0a26a>

Acupuncture for Sleep quality:

<http://www.epistemonikos.org/matrixes/60770b777aac82c4a27e6f7>

Acupuncture for Acute stroke:

<http://www.epistemonikos.org/matrixes/607547867aac84ffe263ce3>

Acupuncture for Carpal tunnel syndrome:

<https://www.epistemonikos.org/matrixes/607562c46ec0d636a11a80f0>

Acupuncture for Cervical vertigo:

<https://www.epistemonikos.org/matrixes/606c9e367aac82511263f05#6080c8097db23a42946079e9>

Acupuncture for Children with Autism spectrum disorder:

<http://www.epistemonikos.org/matrixes/607549af7db23a5a64afd7d1>

Acupuncture for Cognitive impairment after stroke:

<http://www.epistemonikos.org/matrixes/607d5cac7aac81939564de5>

Acupuncture for Depression sleep disorder:

<http://www.epistemonikos.org/matrixes/607568bb7db23a5a64afe193>

Acupuncture for Mild cognitive impairment:

<http://www.epistemonikos.org/matrixes/607560d86ec0d6700019313f>

Acupuncture for Menstrual migraine:

<http://www.epistemonikos.org/matrixes/607697047aac868e92622f8>

Acupuncture for Neuropathic pain:

<http://www.epistemonikos.org/matrixes/60769b327aac80c3027703a>

Acupuncture for Non-acute stage of cerebral infarction neurological function deficit:

<http://www.epistemonikos.org/matrixes/607797686ec0d6027b7f0969>

Acupuncture for Perimenopausal sleep disorders:

<https://www.epistemonikos.org/matrixes/606cd0ee7aac825112653d3#606cd0ee7aac825112653d3>

Acupuncture for Senile insomnia:

<http://www.epistemonikos.org/matrixes/607704227db23a044bafb01e>

Acupuncture for Post-stroke aphasia:

<http://www.epistemonikos.org/matrixes/607413996ec0d636a11a4963>

Acupuncture for Poststroke spastic hemiplegia:

<https://www.epistemonikos.org/matrixes/606cf4a67db23a5dc2b08f34#607541e07db23a5a64afd581>

Acupuncture for Tension-type headache:

<http://www.epistemonikos.org/matrixes/6076aafc7db23a5a64b04823>

Acupuncture for Trigeminal neuralgia:

<http://www.epistemonikos.org/matrixes/607581537db23a5a64afe932>

Acupuncture for Vascular dementia:

<http://www.epistemonikos.org/matrixes/60741c507aac80c3026e8f6>

Sciatica:

<http://www.epistemonikos.org/matrixes/608f473c6ec0d60630e0bbe8>

Quality of Life in Patients With Migraine :

<http://www.epistemonikos.org/matrixes/609140236ec0d655ed7d723b>

#### **Connective tissue diseases:**

Acupuncture for Back pain:

<http://www.epistemonikos.org/matrixes/60654c866ec0d61dc0b9e0d4>

Acupuncture for Chronic knee pain:

<http://www.epistemonikos.org/matrixes/60763d5c6ec0d67000197cae>

Acupuncture for Fibromyalgia syndrome:

<http://www.epistemonikos.org/matrixes/6076bfe26ec0d660db19eeb9>

Acupuncture for Hip osteoarthritis:

<http://www.epistemonikos.org/matrixes/60768e607db23a1655b056b0>

Acupuncture for Knee osteoarthritis:

<http://www.epistemonikos.org/matrixes/6076c2506ec0d6700019a59f>

Acupuncture for Musculoskeletal pain:

<http://www.epistemonikos.org/matrixes/6077f17a6ec0d6027a7ef48a>

Acupuncture for Parkinson's disease:

<http://www.epistemonikos.org/matrixes/6076a3156ec0d67000199c32>

Acupuncture for Primary osteoporosis:

<http://www.epistemonikos.org/matrixes/6077205b7db23a4318afb11e>

#### **Gastrointestinal disorders:**

Acupuncture for Constipation:

<http://www.epistemonikos.org/matrixes/606544157aac85001269b84>

Acupuncture for Functional dyspepsia:

<http://www.epistemonikos.org/matrixes/606547657aac85001269c7d>

Acupuncture for Irritable bowel syndrome:

<http://www.epistemonikos.org/matrixes/60654bae7db23a2fb7b02f74>

Acupuncture for Gastroesophageal reflux disease:

<http://www.epistemonikos.org/matrixes/607466e27aac80c302701b8>

Acupuncture for Peptic ulcer:

<http://www.epistemonikos.org/matrixes/60746fad6ec0d62d51193fe6>

Acupuncture for Symptomatic gastroparesis:

<http://www.epistemonikos.org/matrixes/607415617aac84ffe262ff5>

Acute pancreatitis:

<http://www.epistemonikos.org/matrixes/60913cd17db23a371762cfa0>

### **Genitourinary disorders:**

Acupuncture for Chronic prostatitis:

<http://www.epistemonikos.org/matrixes/6065420e7aac85000261d36>

Acupuncture for Benign prostatic hyperplasia:

<http://www.epistemonikos.org/matrixes/607404097db23a1655afc9c1>

Acupuncture for Chronic kidney disease:

<https://www.epistemonikos.org/en/documents/2c4a15dfe327aa116dad32863b3e16fe4296dfac/matrix>

Acupuncture for Chronic pelvic pain syndrome:

<http://www.epistemonikos.org/matrixes/607451616ec0d62d511934a7>

Acupuncture for Urinary tract infection:

<http://www.epistemonikos.org/matrixes/60741aea7db23a2c33b22b24>

### **Mental health:**

Acupuncture for Depression:

<http://www.epistemonikos.org/matrixes/606545206ec0d61dc0b9debe>

Acupuncture for Postpartum depression:

<http://www.epistemonikos.org/matrixes/607702367aac868e9264478>

Acupuncture for smoking cessation:

<http://www.epistemonikos.org/matrixe/607702c17aac868e92644c1>

Acupuncture for Alcohol dependency:

<http://www.epistemonikos.org/matrixes/6073bd237aac82c4a278889>

Acupuncture for Chronic fatigue syndrome:

<http://www.epistemonikos.org/matrixes/60745af66ec0d660db19bb9a>

Acupuncture for Emotional disorder in patients with chronic pain:

<http://www.epistemonikos.org/matrixe/60745cfd7aac82c4a27a22f>

Acupuncture for Post-traumatic stress disorder:

<http://www.epistemonikos.org/matrixe/6077060d6ec0d613b11902ea>

Acupuncture for Opioid use disorder:

<http://www.epistemonikos.org/matrixes/6074114d7db23a1655afcdbf>

**Nutrition and metabolic disorders:**

Acupuncture for Simple obesity:

<http://www.epistemonikos.org/matrixes/606555887aac81f38258fbf>

**Obstetrics, gynecology and women's health:**

Acupuncture for Dysmenorrhea:

<http://www.epistemonikos.org/matrixes/606546707aac85001269c31>

Acupuncture for Quality of life in menopausal women:

<http://www.epistemonikos.org/matrixes/606552906ec0d61dc0b9e298>

Acupuncture for Labor pain:

<http://www.epistemonikos.org/matrixes/6065593f6ec0d61dbfb960fa>

Acupuncture for Luteinized unruptured follicle syndrome:

<http://www.epistemonikos.org/matrixes/6074672d7aac82c4a27a429>

Acupuncture for Menopausal hot flashes:

<http://www.epistemonikos.org/matrixes/6075828b7db23a5a64afe983>

Acupuncture for Poor ovarian responders:

<http://www.epistemonikos.org/matrixes/60746f547db23a5dc2b211f3>

Acupuncture for Postmenopausal osteoporosis:

<http://www.epistemonikos.org/matrixes/607470127aac8550b26d0e0>

Acupuncture for Postpartum lactation:

<http://www.epistemonikos.org/matrixes/607583bb6ec0d67000193c79>

**Pregnancy or intended pregnancy:**

Acupuncture for Infertility:

<http://www.epistemonikos.org/matrixes/606548cc6ec0d61dc0b9dfcf>

Acupuncture for Hyperemesis gravidarum:

<http://www.epistemonikos.org/matrixes/606558736ec0d61dc0b9e444>

Acupuncture for Vomitus gravidarum:

<http://www.epistemonikos.org/matrixes/606558736ec0d61dc0b9e444>

Acupuncture for Pregnancy outcomes of in vitro fertilization:

<http://www.epistemonikos.org/matrixes/607470217db23a3f42b0efd4>

**Perioperative diseases:**

Acupuncture for Hot flashes after breast cancer surgery:

<http://www.epistemonikos.org/matrixes/60741b957aac80c3026e89a>

Acupuncture for Pain control after total knee arthroplasty:

<http://www.epistemonikos.org/matrixes/60766b257aac868e9261718>

Acupuncture for Postoperative pain:

<http://www.epistemonikos.org/matrixes/60766be16ec0d67000198c77>

Acupuncture for Recovery of gastrointestinal function after operation:

<http://www.epistemonikos.org/matrixe/60766c7d6ec0d67000198ca4>

**Ear, nose, and throat disorders:**

Acupuncture for Rhinitis:

<http://www.epistemonikos.org/matrixes/606553857aac81f38258f0f>

Meniere disease:

<http://www.epistemonikos.org/matrixes/60a3fb477aac828e47619af>
